# Supplementary material for: Design, Sustainable Synthesis and Biological Evaluation of a Novel Dual α2A/5-HT7 Receptor Antagonist with Antidepressant-Like Properties
Source: MDPI journal article supplement (doi:10.3390/molecules26133828), 2021-06-23
Supplement: s1 [file s1]

## Supplementary Materials

# Design, Sustainable Synthesis and Biological Evaluation of a Novel Dual $\alpha_{2A}/5\text{-HT}_7$ Receptor Antagonist

Vittorio Canale <sup>1</sup>, Magdalena Kotańska <sup>2</sup>, Anna Dziubina <sup>2</sup>, Matylda Stefaniak <sup>1</sup>, Agata Siwek <sup>3</sup>, Gabriela Starowicz <sup>3</sup>, Krzysztof Marciniak <sup>4</sup>, Patryk Kasza <sup>1</sup>, Grzegorz Satała <sup>5</sup>, Beata Duszyńska <sup>5</sup>, Xavier Bantreil <sup>6</sup>, Frédéric Lamaty <sup>6</sup>, Marek Bednarski <sup>2</sup>, Jacek Sapa <sup>2</sup> and Paweł Zajdel <sup>1,\*</sup>

<sup>1</sup> Department of Organic Chemistry, Faculty of Pharmacy, Jagiellonian University Medical College, 9 Medyczna Street, 30-688 Kraków, Poland

<sup>2</sup> Department of Pharmacodynamics, Faculty of Pharmacy, Jagiellonian University Medical College, 9 Medyczna Street, 30-688 Kraków, Poland

<sup>3</sup> Department of Pharmacobiology, Faculty of Pharmacy, Jagiellonian University Medical College, 9 Medyczna Street, 30-688 Kraków, Poland

<sup>4</sup> Department of Organic Chemistry, Medical University of Silesia, 4 Jagiellońska Street, 41-200 Sosnowiec, Poland

<sup>5</sup> Department of Medicinal Chemistry, Maj Institute of Pharmacology, Polish Academy of Sciences, 12 Smętna Street, 31-343 Kraków, Poland

<sup>6</sup> IBMM, Université de Montpellier, CNRS, ENSCM, 34095 Montpellier, France

**Table S1.** Optimization of milling conditions for alkylation of 4-Boc-N-aminopiperidine.

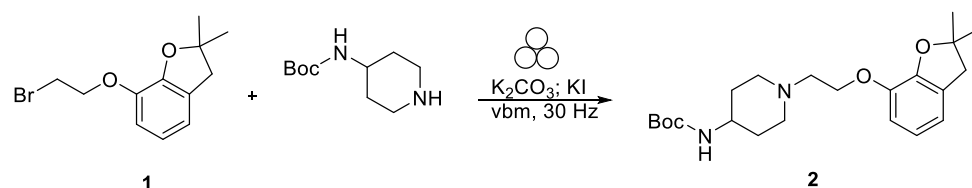

|                       | Amine<br>eq | K <sub>2</sub> CO <sub>3</sub><br>eq | KI<br>eq | Time<br>[min] | % conversion<br>for 2 <sup>a</sup> |
|-----------------------|-------------|--------------------------------------|----------|---------------|------------------------------------|
| <b>1</b>              | 1           | 3                                    | 0.5      | 140           | 74                                 |
| <b>2</b>              | 1.2         | 3                                    | -        | 20            | 0                                  |
| <b>3</b>              | 1.2         | 3                                    | 0.5      | 20            | 4                                  |
| <b>4</b>              | 1.2         | 3                                    | -        | 100           | 15                                 |
| <b>5</b>              | 1.2         | 3                                    | 0.5      | 100           | 49                                 |
| <b>6</b>              | 1.2         | 3                                    | -        | 120           | 19                                 |
| <b>7</b>              | 1.2         | 3                                    | 0.5      | 120           | 82                                 |
| <b>8</b>              | 1.2         | 3                                    | -        | 140           | 23                                 |
| <b>9</b>              | 1.2         | 3                                    | 0.5      | 140           | 87                                 |
| <b>19</b>             | 1.2         | 2                                    | 0.5      | 140           | 87                                 |
| <b>11</b>             | 1.2         | 2                                    | 0.25     | 140           | 36                                 |
| <b>12<sup>b</sup></b> | 1.2         | 2                                    | 0.5      | 140           | 36                                 |
| <b>13<sup>b</sup></b> | 1.2         | 2                                    | 0.5      | 210           | 69                                 |
| <b>14<sup>b</sup></b> | 1.2         | 3                                    | 0.5      | 140           | 57                                 |
| <b>15<sup>b</sup></b> | 1.2         | 3                                    | 0.5      | 210           | 97 (84) <sup>c</sup>               |

Reaction conditions: vbm 30 Hz,  $\phi_{ball} = 1.5$  cm, total mass of reagents = 125 mg, milling load 15 mg/mL, 10 mL PTFE jar; <sup>a</sup>Conversions were determined by HPLC, <sup>b</sup>Reaction conditions: vbm 30 Hz,  $\phi_{ball} = 1.5$  cm, total mass of reagents = 500 mg, 35 mL PTFE jar, <sup>c</sup>Yield for isolated compound.

**Table S2.** Optimization of milling conditions for alkylation of 4-Boc-*N* aminomethylpiperidine.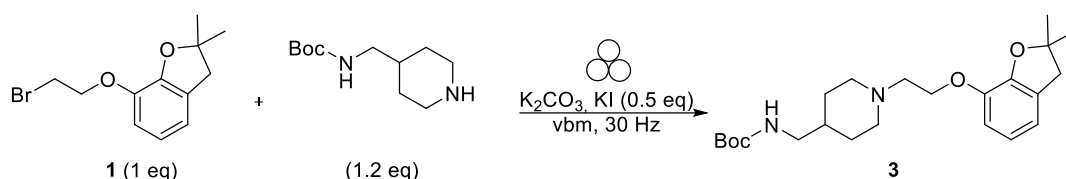

| entry | base (K <sub>2</sub> CO <sub>3</sub> ) (eq) | time [min] | % conversion for 3 <sup>a</sup> |
|-------|---------------------------------------------|------------|---------------------------------|
| 1     | 2                                           | 140        | 62                              |
| 2     | 3                                           | 140        | 82                              |
| 3     | 3                                           | 210        | 84 (81) <sup>b</sup>            |

Reaction conditions: vbm 30 Hz,  $\phi_{\text{ball}}$  = 1.5 cm, total mass of reagents = 500 mg, milling load 15 mg/mL, 35 mL PTFE jar,

<sup>a</sup>Conversions were determined by HPLC, <sup>b</sup>Yield for isolated compound

**Table S3.** Optimization of milling conditions for sulfonylation of primary amine.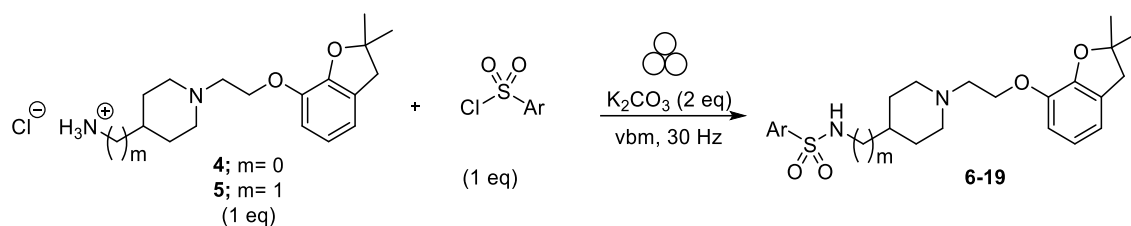

| entry | product | Ar                | time [min] | % conversion <sup>a</sup> | % yield <sup>b</sup> |
|-------|---------|-------------------|------------|---------------------------|----------------------|
| 1     | 6       | 4-F-phenyl        | 1          | 91                        | 89                   |
| 2     | 7       | 3-Cl-phenyl       | 1          | 88                        | 86                   |
| 3     | 8       | 5-Cl,2-F-phenyl   | 5          | 69                        | 68                   |
| 4     | 9       | 5-Cl,2-MeO-phenyl | 10         | 84                        | 84                   |
| 5     | 10      | 2,5-diMeO-phenyl  | 5          | 79                        | 70                   |
| 6     | 11      | 1-naphtyl         | 5          | 74                        | 69                   |
| 7     | 12      | 2-naphtyl         | 5          | 65                        | 65                   |
| 8     | 13      | 4-isoquinolyl     | 5          | 85                        | 82                   |
| 9     | 14      | 4-F-phenyl        | 1          | 91                        | 90                   |
| 10    | 15      | 3-Cl-phenyl       | 1          | 82                        | 83                   |
| 11    | 16      | 5-Cl,2-F-phenyl   | 5          | 70                        | 67                   |
| 12    | 17      | 5-Cl,2-MeO-phenyl | 10         | 78                        | 76                   |
| 13    | 18      | 1-naphtyl         | 5          | 78                        | 73                   |
| 14    | 19      | 4-isoquinolyl     | 5          | 98                        | 94                   |

Reaction conditions: vbm 30 Hz,  $\phi_{\text{ball}}$  = 1.5 cm, total mass of reagents = 125 mg, milling load 15 mg/mL, 10 mL PTFE jar,

<sup>a</sup>Conversions were determined by HPLC, <sup>b</sup>Yield for isolated compound.

# 1. MS, <sup>1</sup>H-NMR and <sup>13</sup>C-NMR for intermediates and final compounds

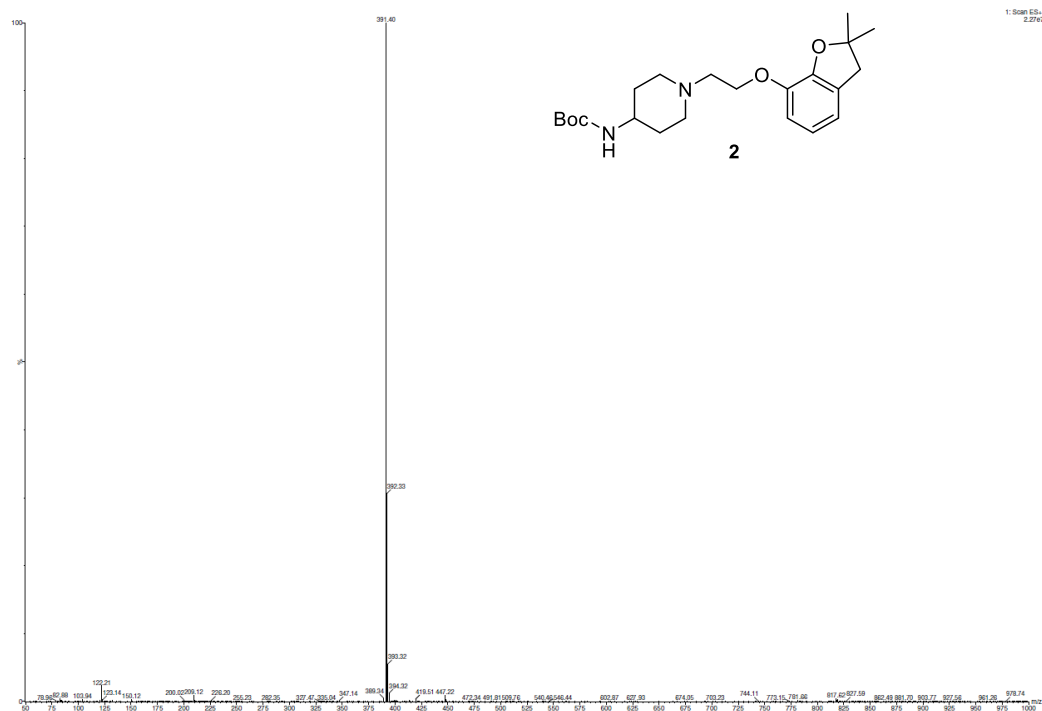

**Figure S1.** MS spectra for *tert*-butyl {1-[2-(2,2-dimethyl-2,3-dihydrobenzofuran-7-yloxy)ethyl]piperidin-4-yl}carbamate (**2**).

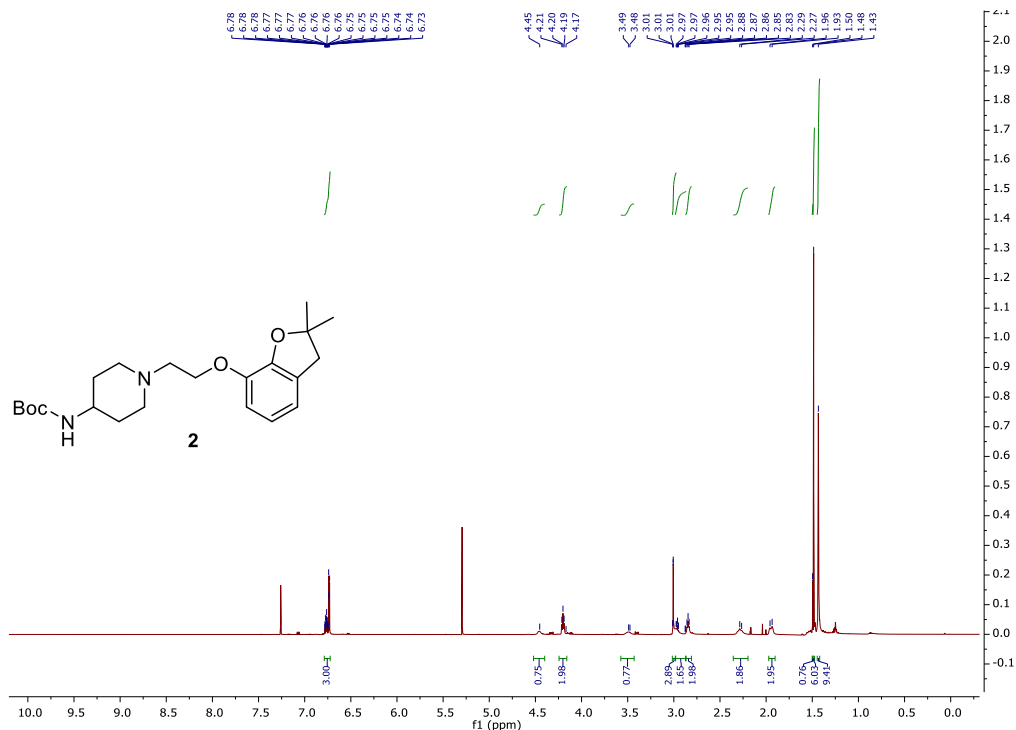

**Figure S2.** <sup>1</sup>H-NMR spectra (500 MHz, CDCl<sub>3</sub>) for *tert*-butyl {1-[2-(2,2-dimethyl-2,3-dihydrobenzofuran-7-yloxy)ethyl]piperidin-4-yl}carbamate (**2**).

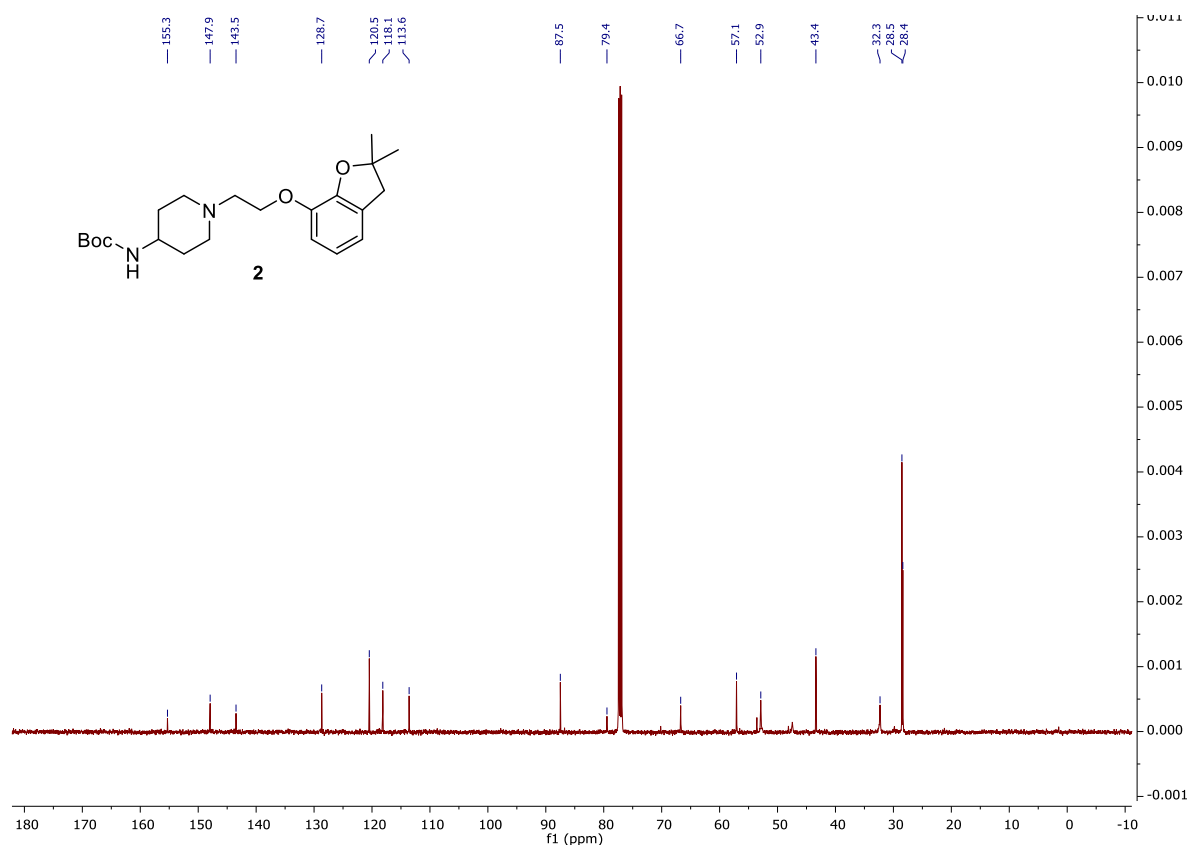

**Figure S3.** <sup>13</sup>C-NMR spectra (125 MHz, CDCl<sub>3</sub>) for *tert*-butyl {1-[2-(2,2-dimethyl-2,3-dihydrobenzofuran-7-yloxy)ethyl]piperidin-4-yl}carbamate (2).

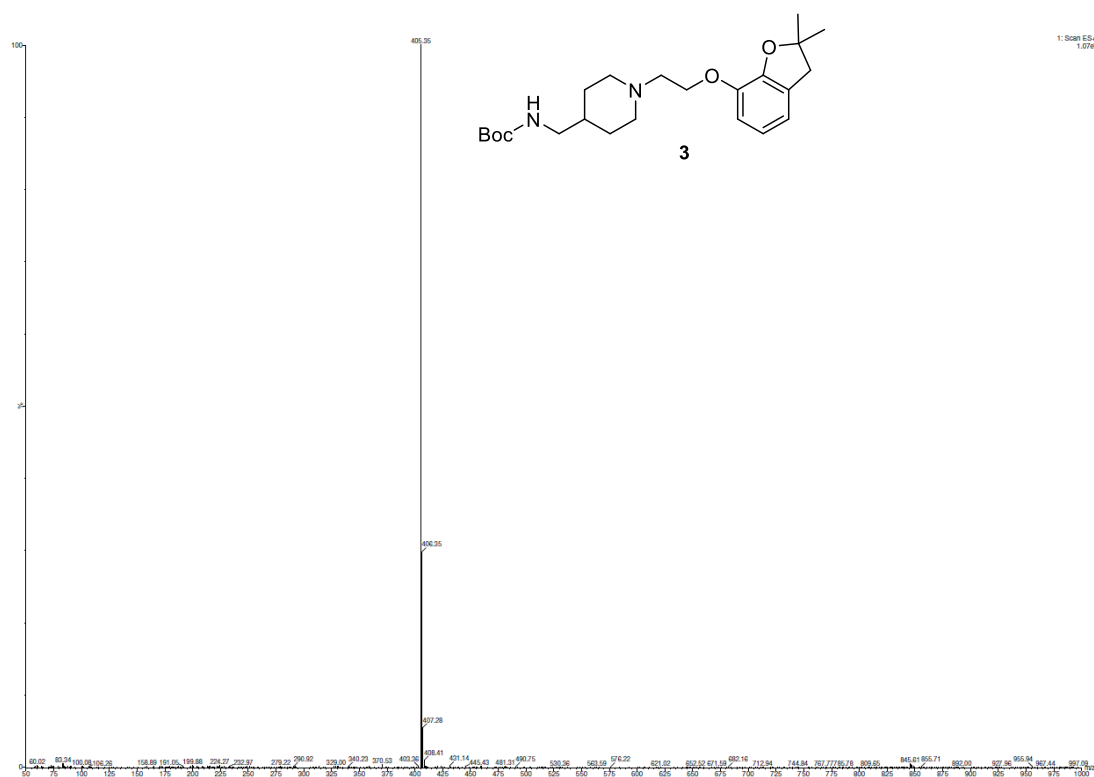

**Figure S4.** MS spectra for *tert*-butyl {1-[2-(2,2-dimethyl-2,3-dihydrobenzofuran-7-yloxy)ethyl]piperidin-4-yl}methylcarbamate (3).

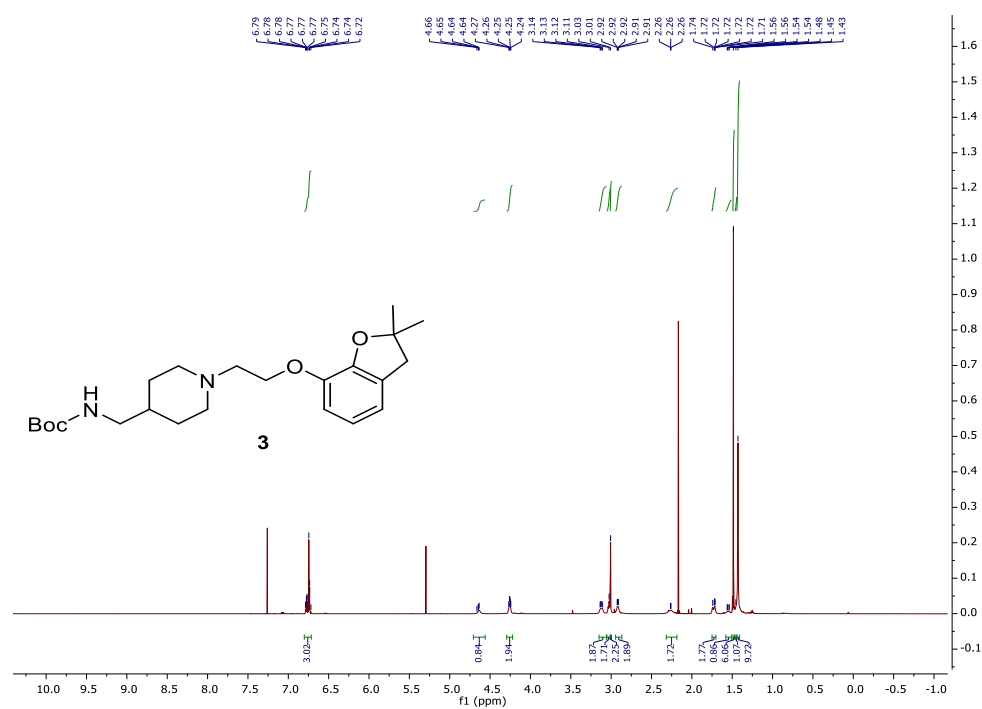

**Figure S5.** <sup>1</sup>H-NMR spectra (500 MHz, CDCl<sub>3</sub>) for *tert*-butyl ((1-[2-(2,2-dimethyl-2,3-dihydrobenzofuran-7-yloxy)ethyl]piperidin-4-yl)methyl)carbamate (**3**).

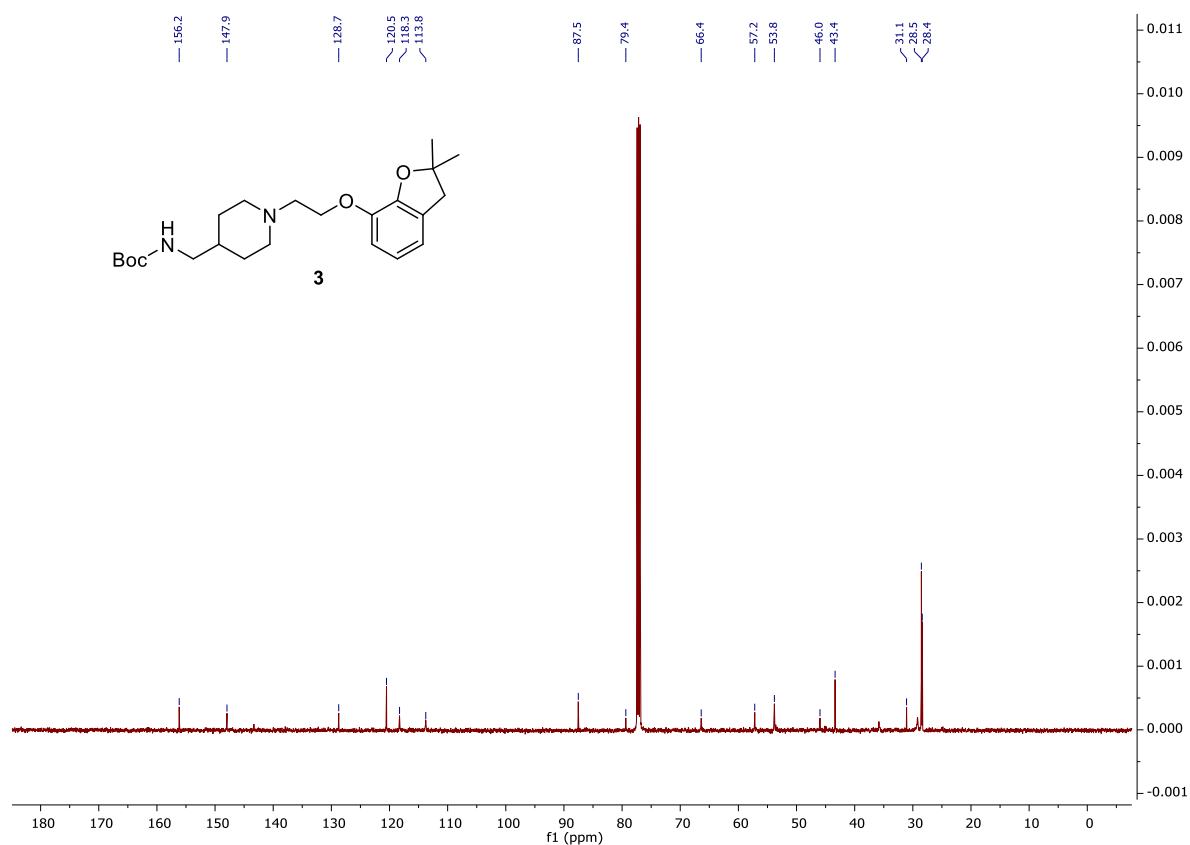

**Figure S6.** <sup>13</sup>C-NMR spectra (125 MHz, CDCl<sub>3</sub>) for *tert*-butyl ((1-[2-(2,2-dimethyl-2,3-dihydrobenzofuran-7-yloxy)ethyl]piperidin-4-yl)methyl)carbamate (**3**).

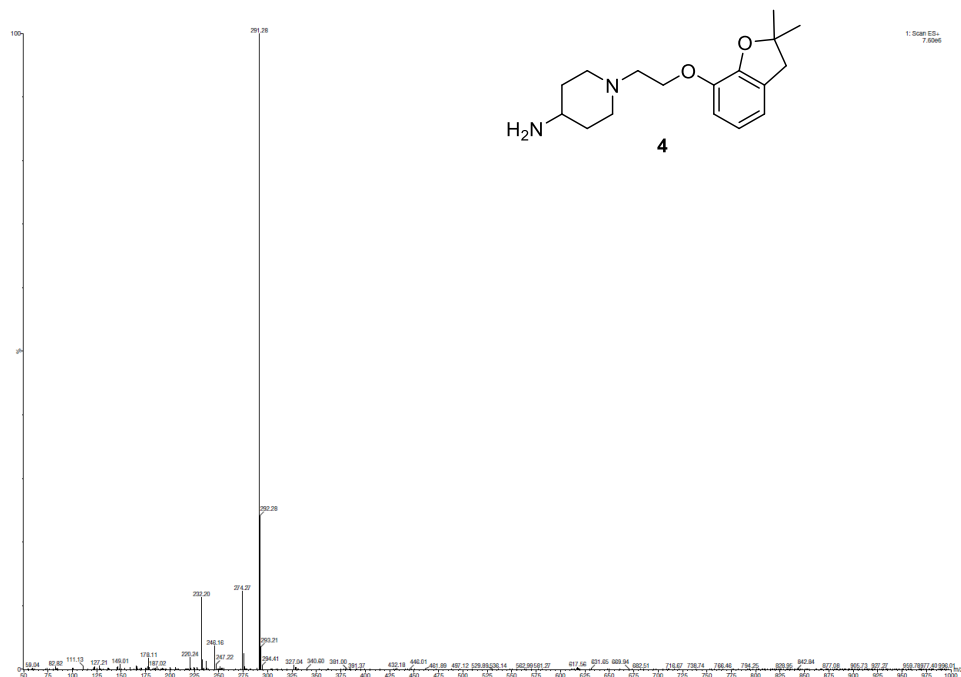

**Figure S7.** MS spectra for 1-[2-[(2,2-dimethyl-2,3-dihydrobenzofuran-7-yl)oxy]ethyl]piperidin-4-amine (**4**).

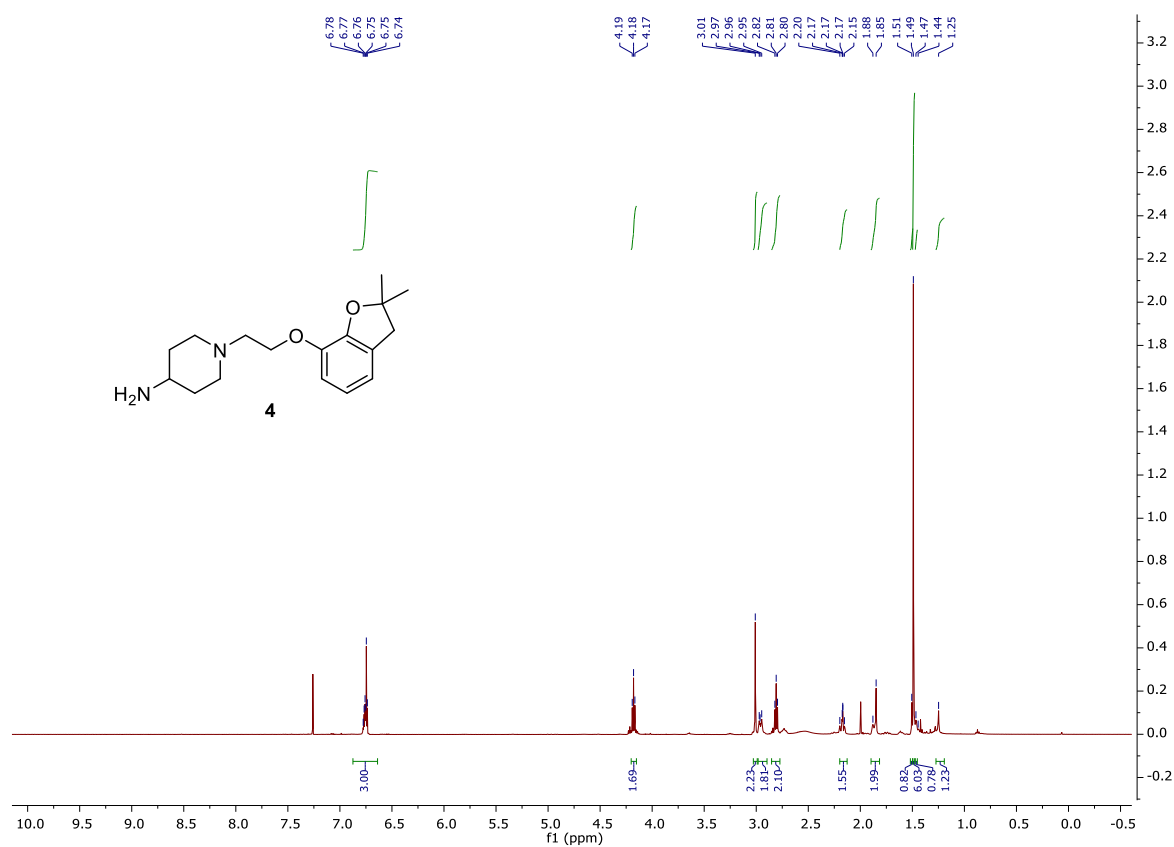

**Figure S8.**  $^1\text{H}$ -NMR spectra (500 MHz,  $\text{CDCl}_3$ ) for 1-[2-[(2,2-dimethyl-2,3-dihydrobenzofuran-7-yl)oxy]ethyl]piperidin-4-amine (**4**).

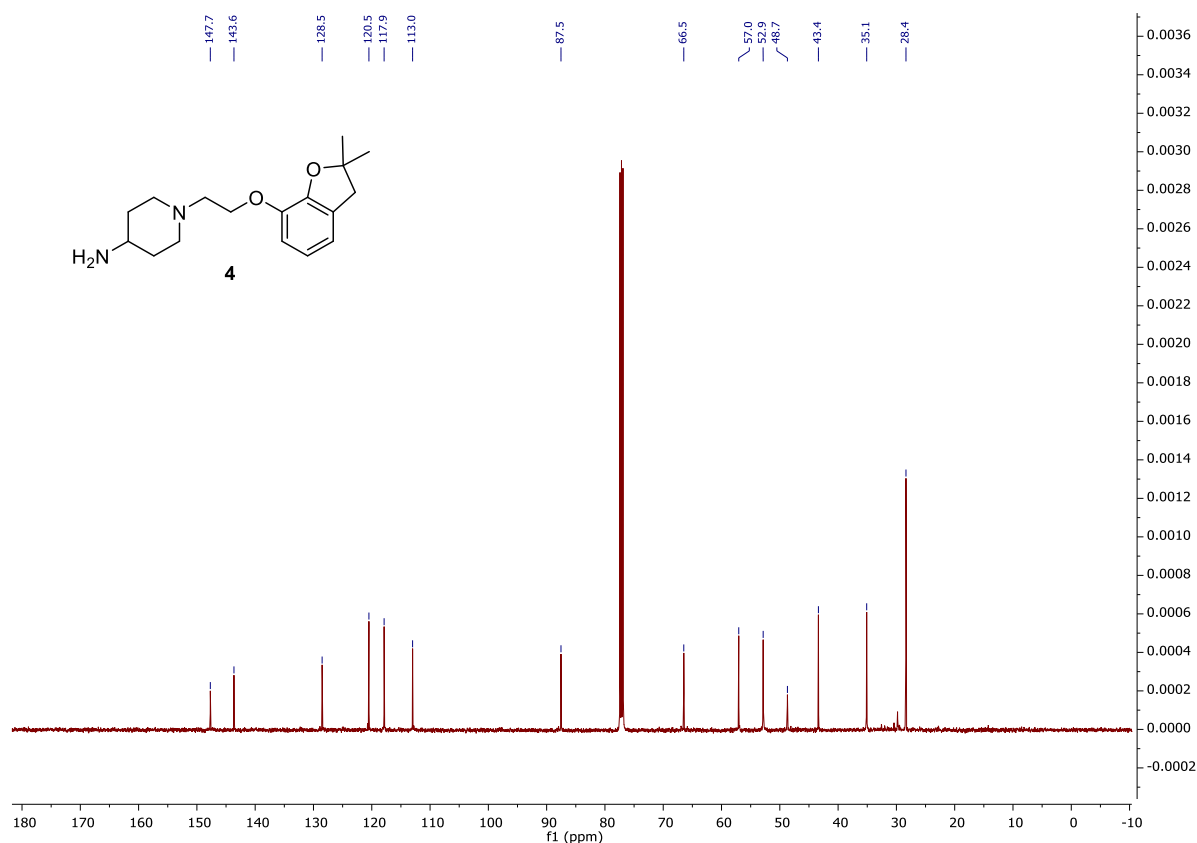

**Figure S9.** <sup>13</sup>C-NMR spectra (125 MHz, CDCl<sub>3</sub>) for 1-[2-[(2,2-dimethyl-2,3-dihydrobenzofuran-7-yl)oxy]ethyl]piperidin-4-amine (**4**).

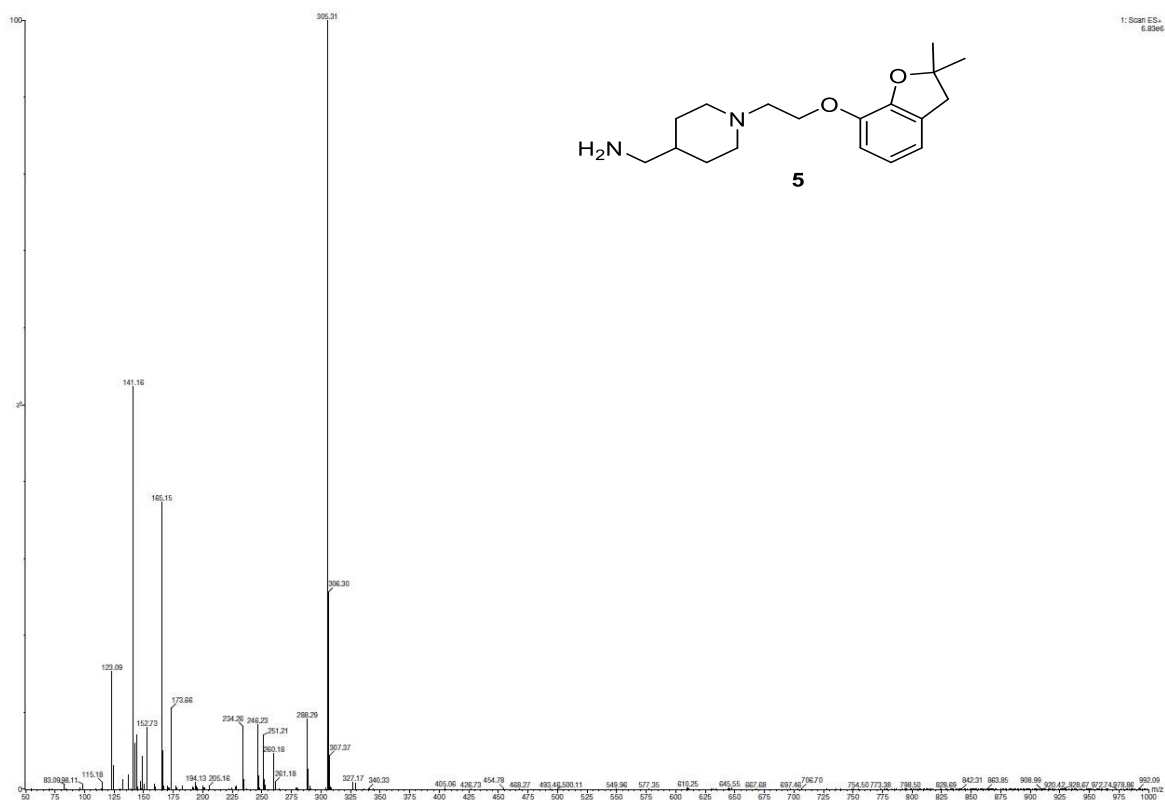

**Figure S10.** MS spectra for 1-[2-[(2,2-dimethyl-2,3-dihydrobenzofuran-7-yl)oxy]ethyl]piperidin-4-yl)methanamine (**5**).

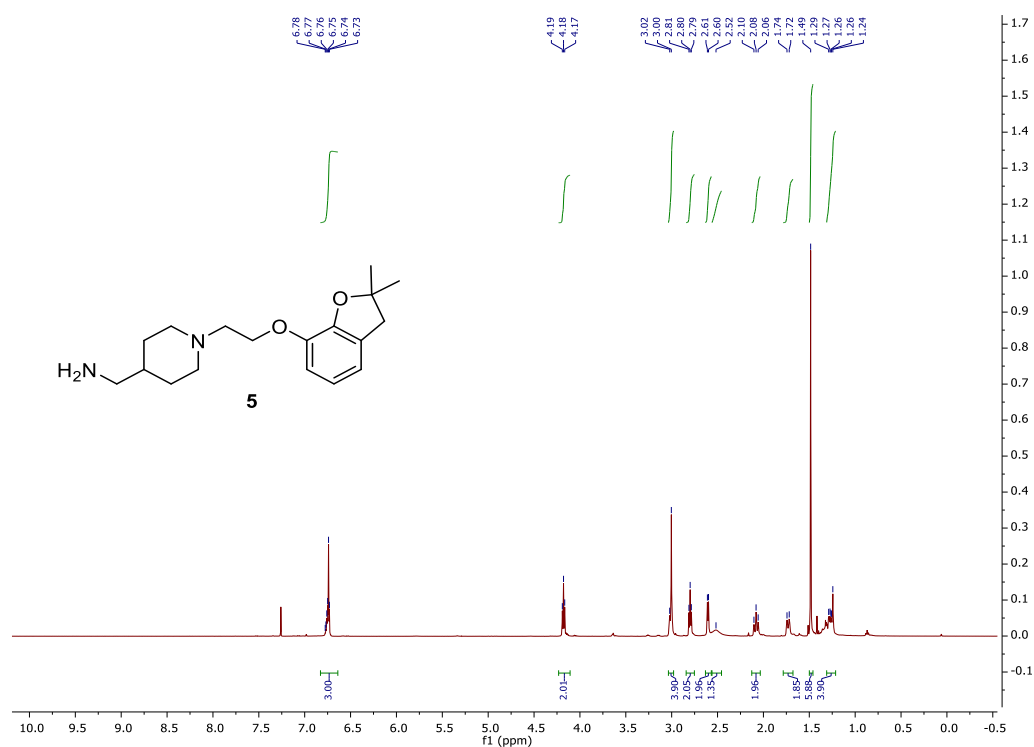

**Figure S11.** <sup>1</sup>H-NMR spectra (500 MHz, CDCl<sub>3</sub>) for (1-{2-[(2,2-dimethyl-2,3-dihydrobenzofuran-7-yl)oxy]ethyl}piperidin-4-yl)methanamine (**5**).

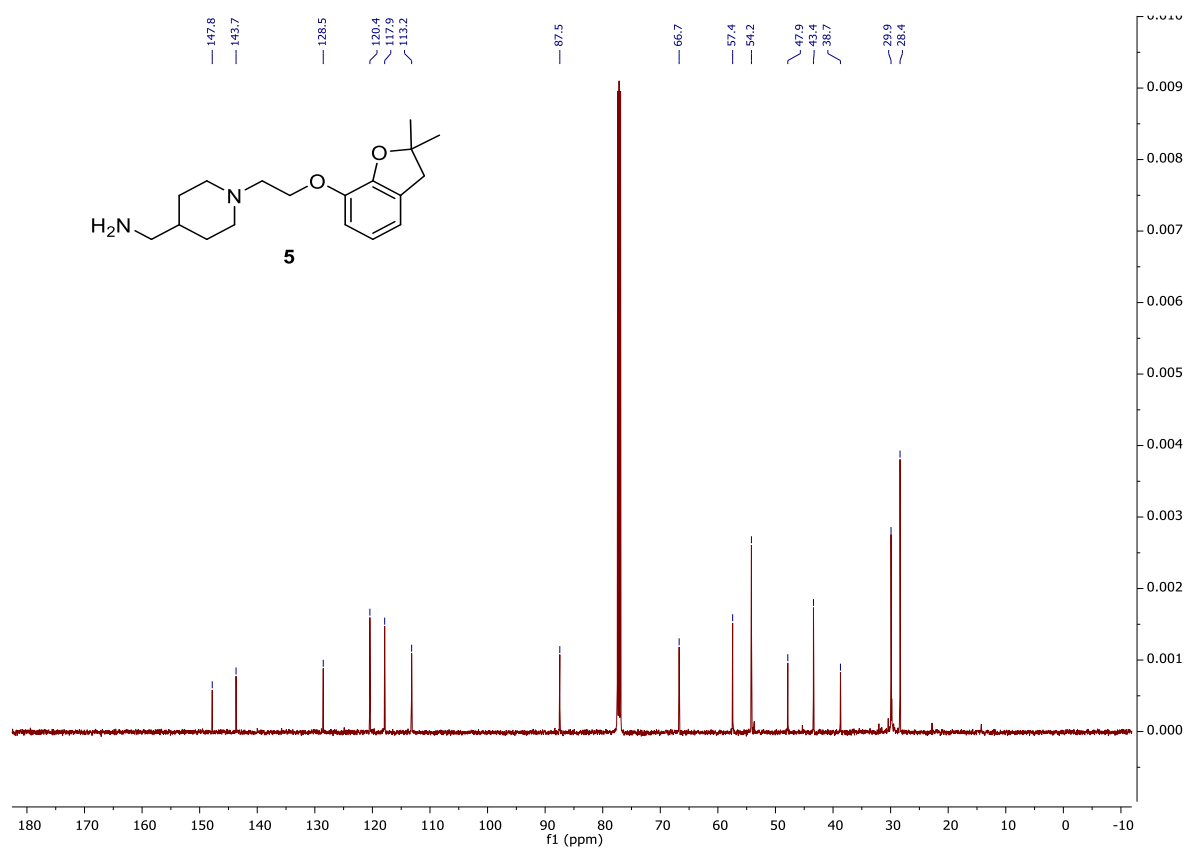

**Figure S12.** <sup>13</sup>C-NMR spectra (125 MHz, CDCl<sub>3</sub>) for (1-{2-[(2,2-dimethyl-2,3-dihydrobenzofuran-7-yl)oxy]ethyl}piperidin-4-yl)methanamine (**5**).



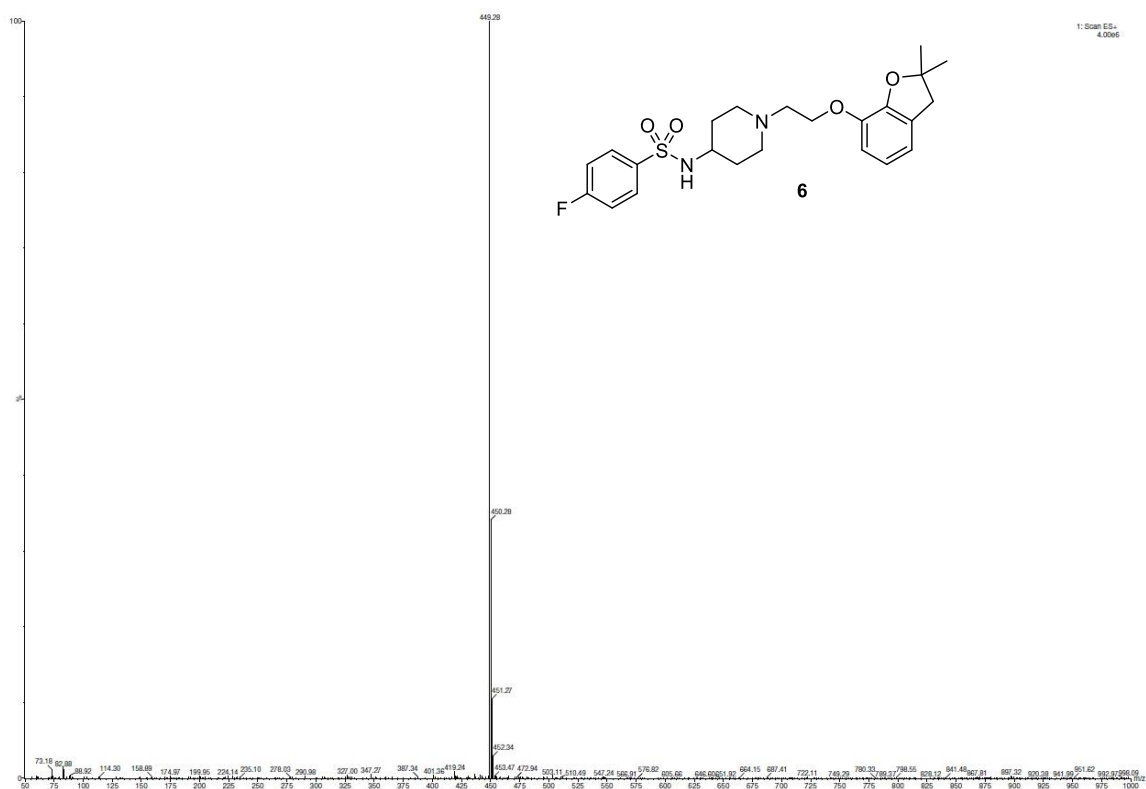

**Figure S13.** MS spectra for 4-fluoro-N-[1-[2-(2,2-dimethyl-2,3-dihydrobenzofuran-7-yloxy)ethyl]piperidin-4-yl]benzenesulfonamide (6).

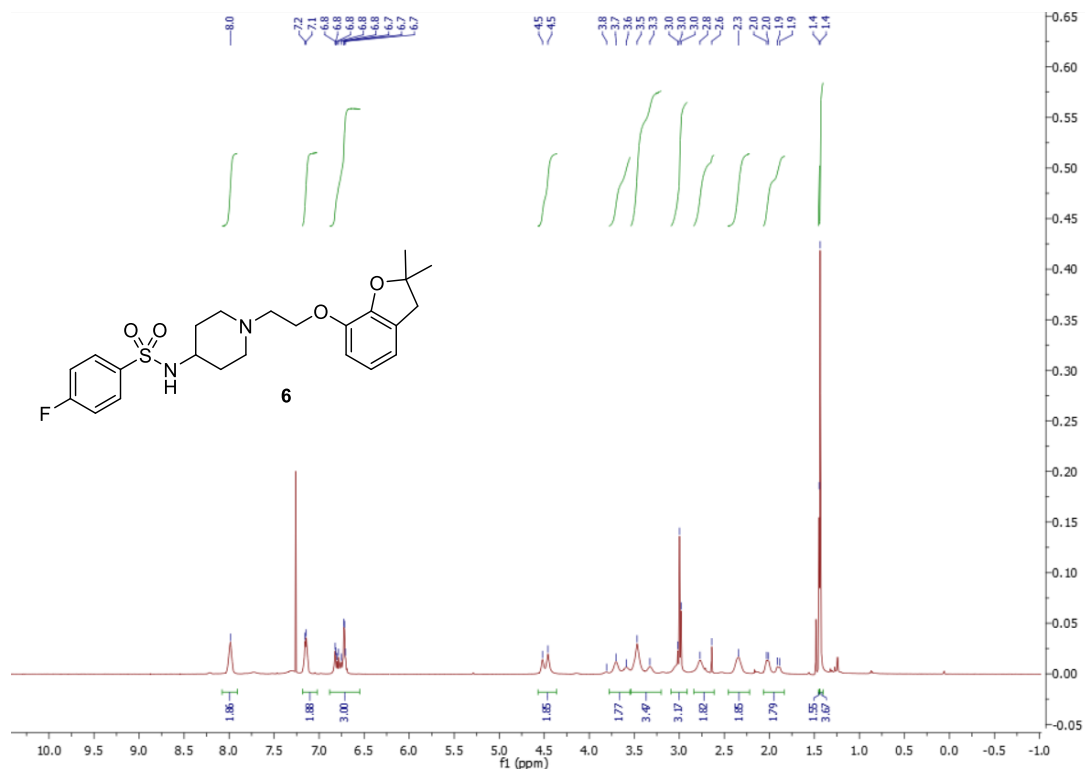

**Figure S14.** <sup>1</sup>H-NMR spectra (500 MHz, CDCl<sub>3</sub>) for 4-fluoro-N-[1-[2-(2,2-dimethyl-2,3-dihydrobenzofuran-7-yloxy)ethyl]piperidin-4-yl]benzenesulfonamide (6).

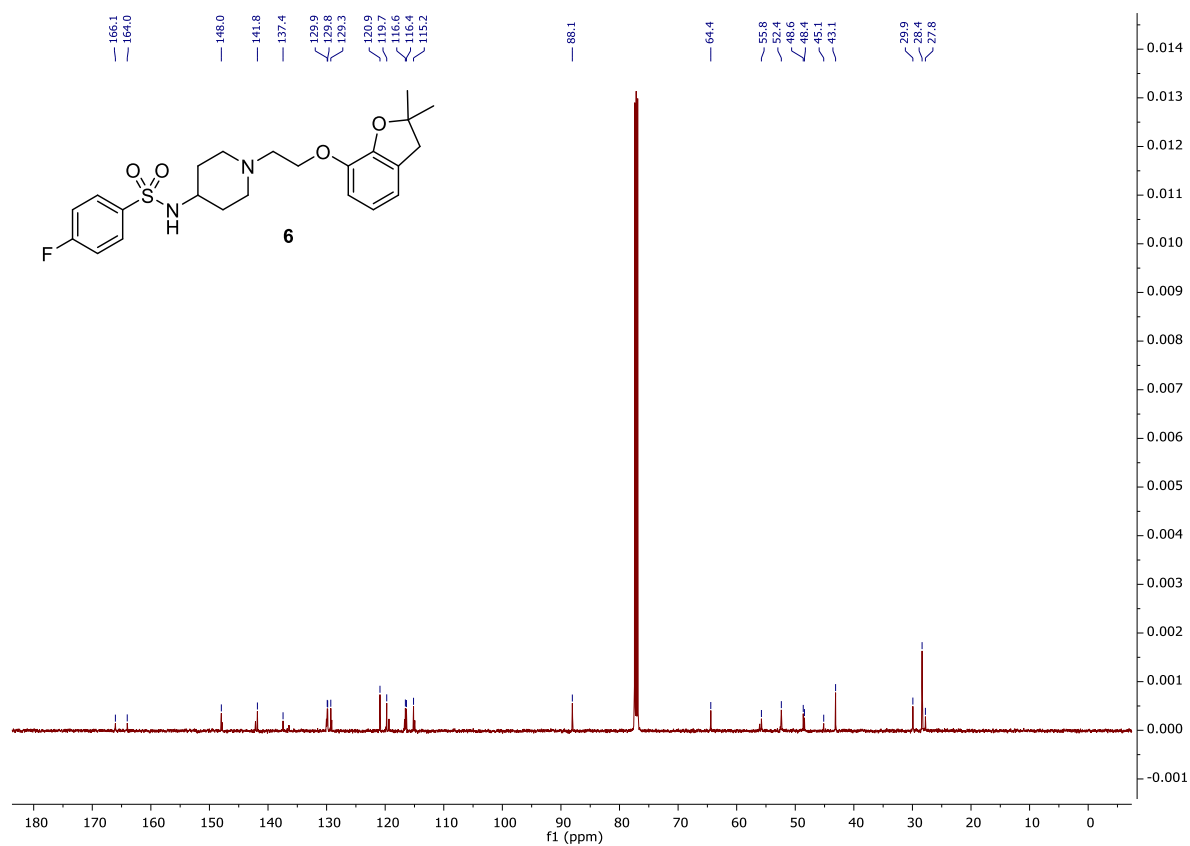

**Figure S15.**  $^{13}\text{C}$ -NMR spectra (125 MHz,  $\text{CDCl}_3$ ) for 4-fluoro-*N*-[1-[2-(2,2-dimethyl-2,3-dihydrobenzofuran-7-yloxy)ethyl]piperidin-4-yl]benzenesulfonamide (6).

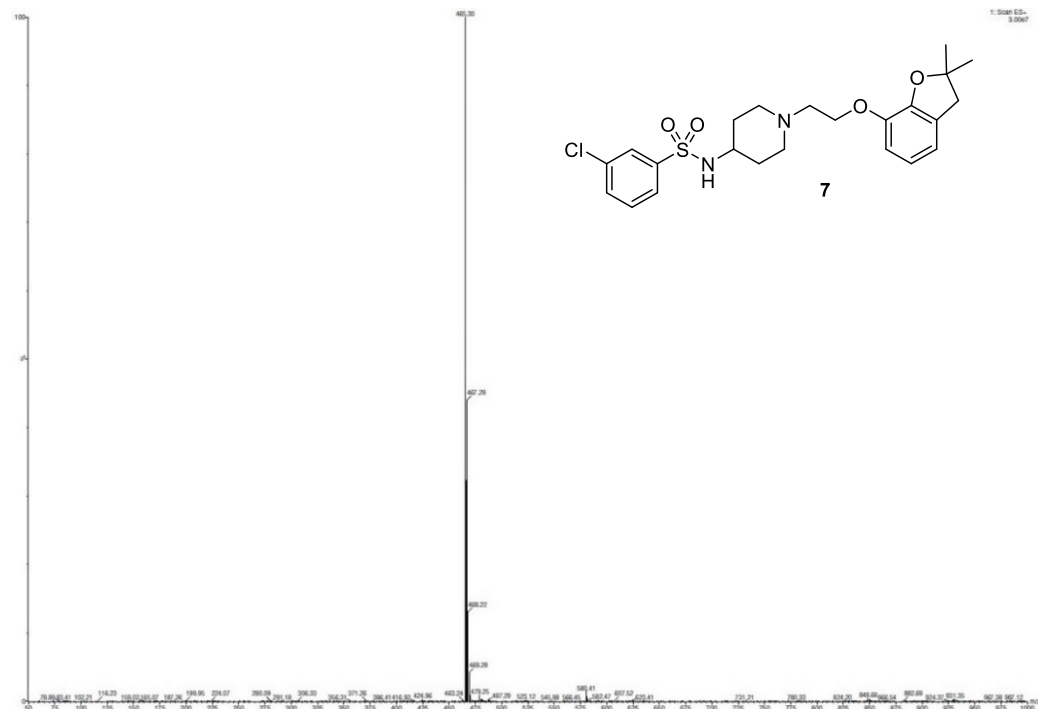

**Figure S16.** MS spectra for 3-chloro-*N*-[1-[2-(2,2-dimethyl-2,3-dihydrobenzofuran-7-yloxy)ethyl]piperidin-4-yl] benzenesulfonamide (7).

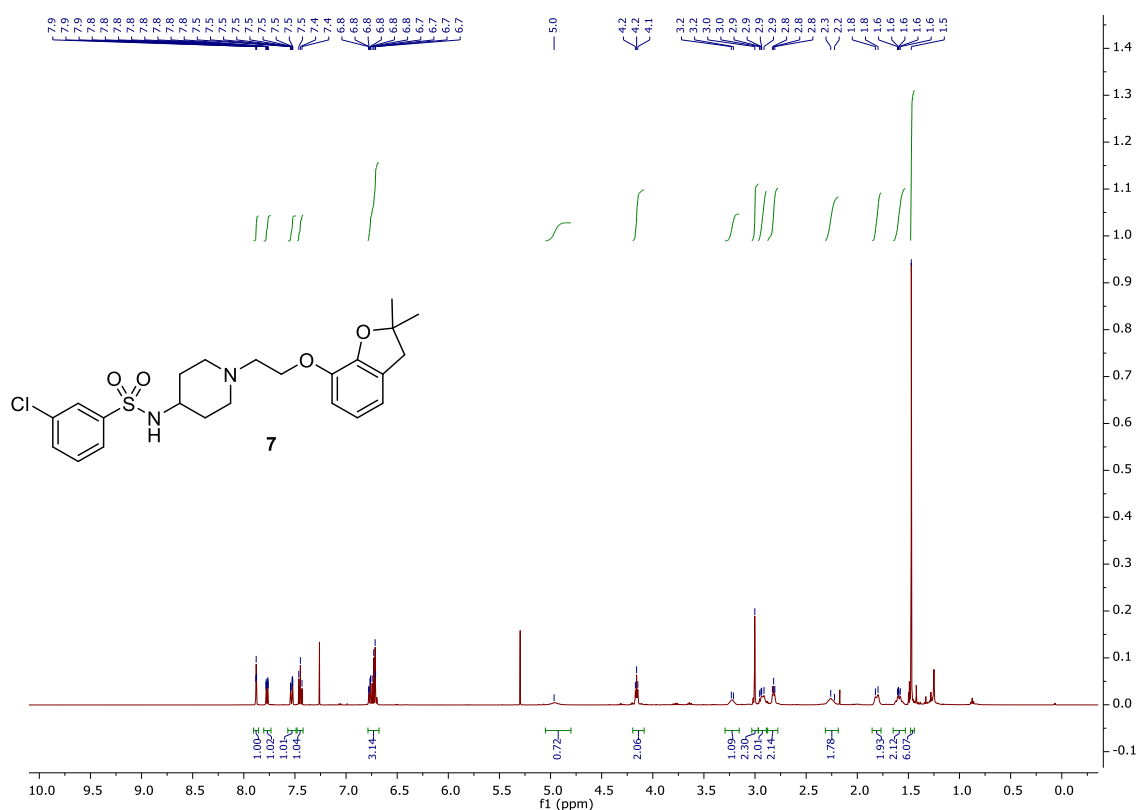

**Figure S17.** <sup>1</sup>H-NMR spectra (500 MHz, CDCl<sub>3</sub>) for 3-chloro-*N*-[1-[2-(2,2-dimethyl-2,3-dihydrobenzofuran-7-yloxy)ethyl]piperidin-4-yl] benzenesulfonamide (7).

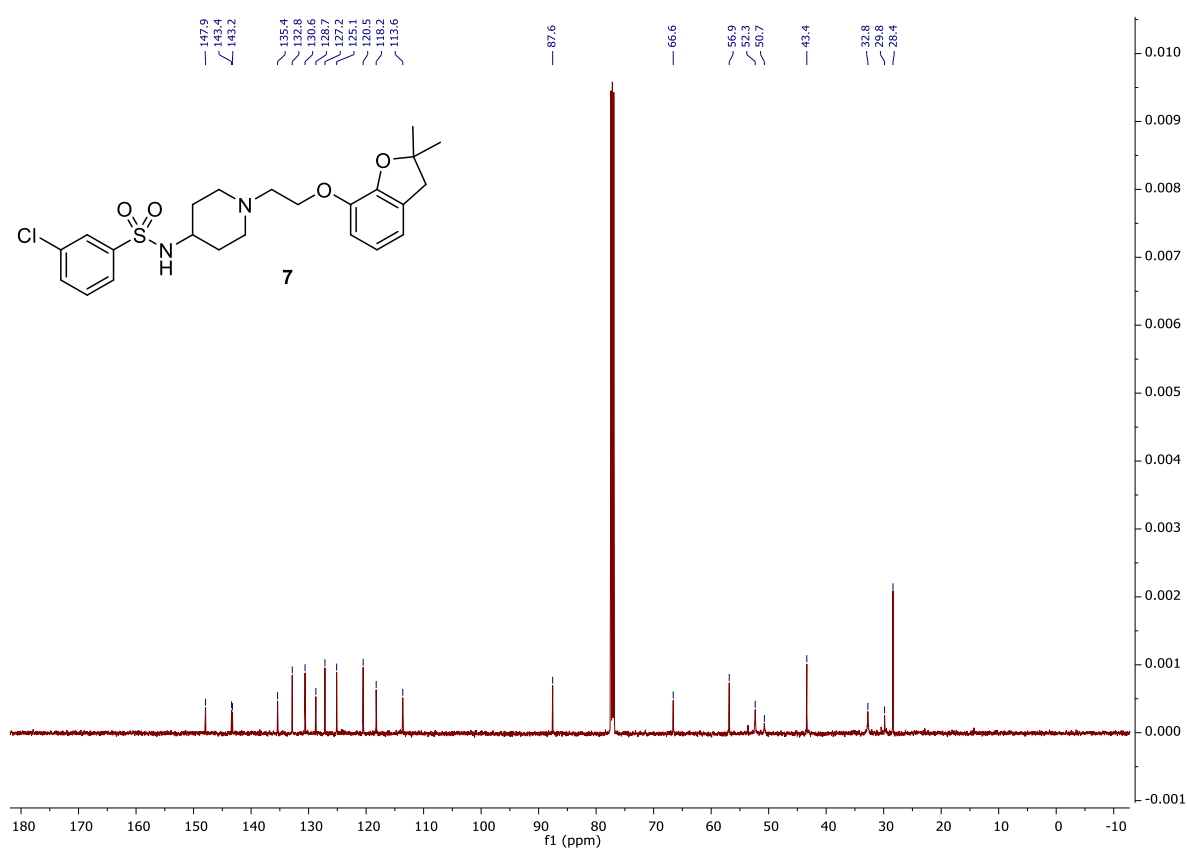

**Figure S18.** <sup>13</sup>C-NMR spectra (125 MHz, CDCl<sub>3</sub>) for 3-chloro-*N*-[1-[2-(2,2-dimethyl-2,3-dihydrobenzofuran-7-yloxy)ethyl]piperidin-4-yl] benzenesulfonamide (7).

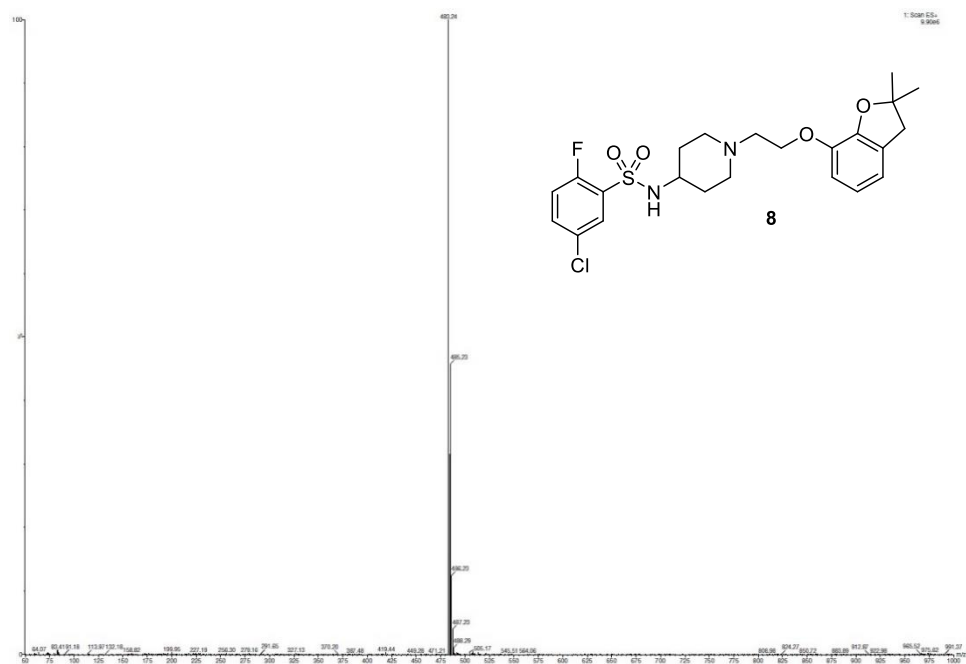

**Figure S19.** MS spectra for 5-chloro-2-fluoro-*N*-{1-[2-(2,2-dimethyl-2,3-dihydrobenzofuran-7-yloxy)ethyl]piperidin-4-yl}benzenesulfonamide (**8**).

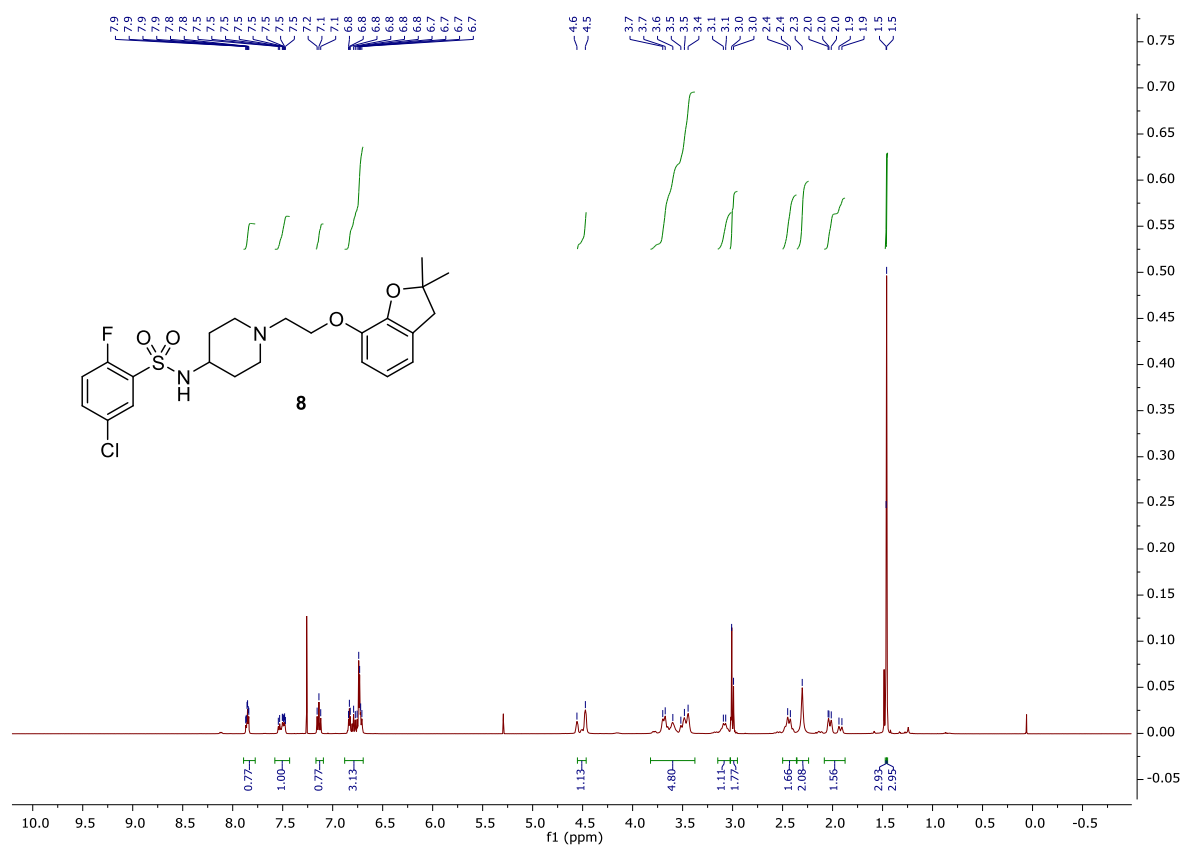

**Figure S20.**  $^1\text{H}$ -NMR spectra (500 MHz,  $\text{CDCl}_3$ ) for 5-chloro-2-fluoro-*N*-{1-[2-(2,2-dimethyl-2,3-dihydrobenzofuran-7-yloxy)ethyl]piperidin-4-yl}benzenesulfonamide (**8**).

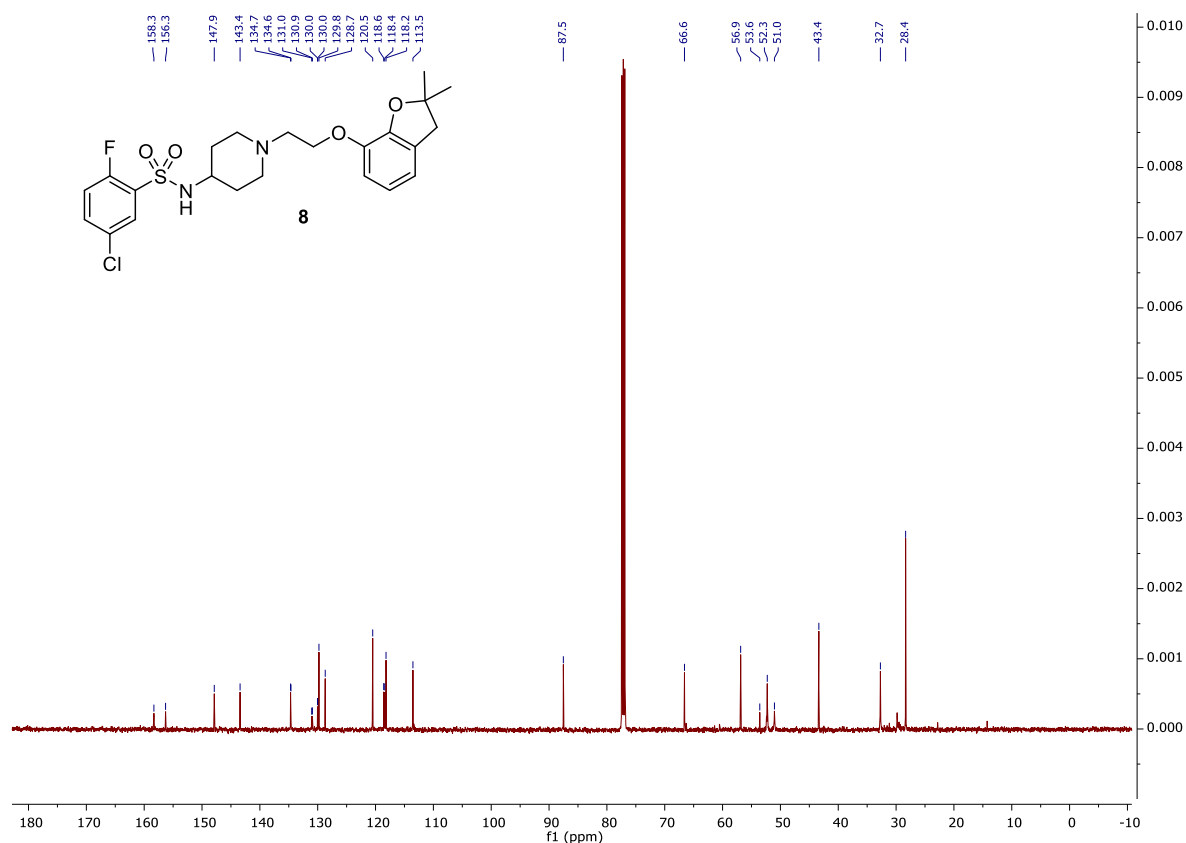

**Figure S21.**  $^{13}\text{C}$ -NMR spectra (125 MHz,  $\text{CDCl}_3$ ) for 5-chloro-2-fluoro-*N*-[1-[2-(2,2-dimethyl-2,3-dihydrobenzofuran-7-yloxy)ethyl]piperidin-4-yl]benzenesulfonamide (**8**).

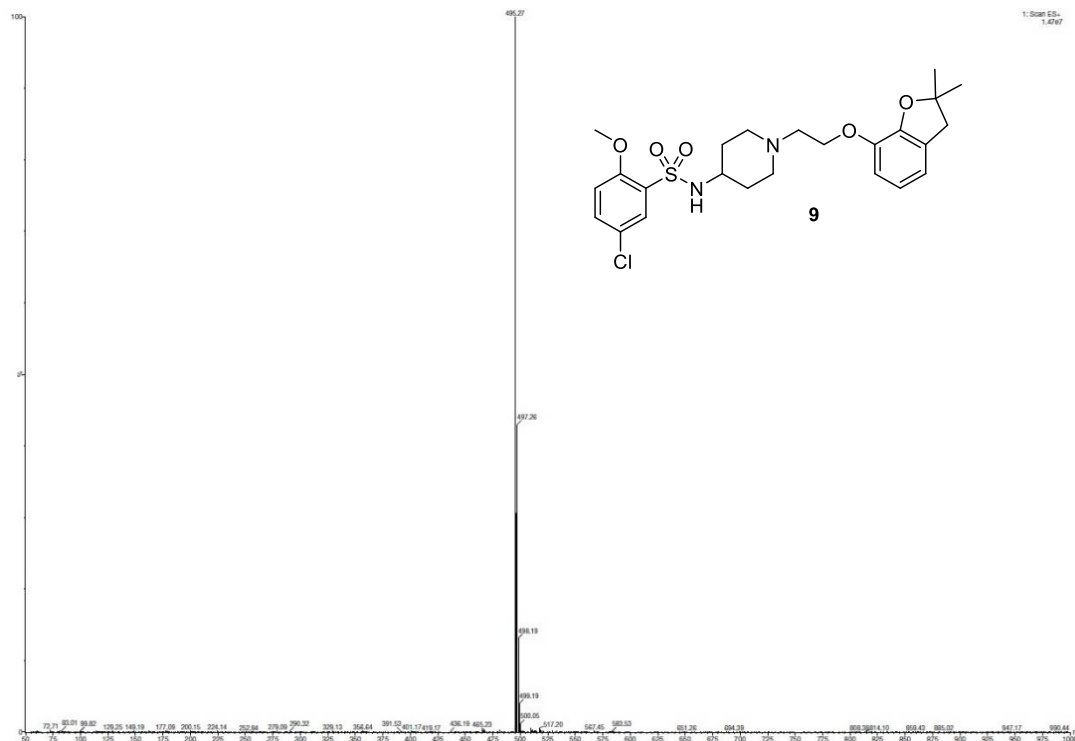

**Figure S22.** MS spectra for 5-chloro-2-methoxy-*N*-[1-[2-(2,2-dimethyl-2,3-dihydrobenzofuran-7-yloxy)ethyl]piperidin-4-yl]benzenesulfonamide (**9**).

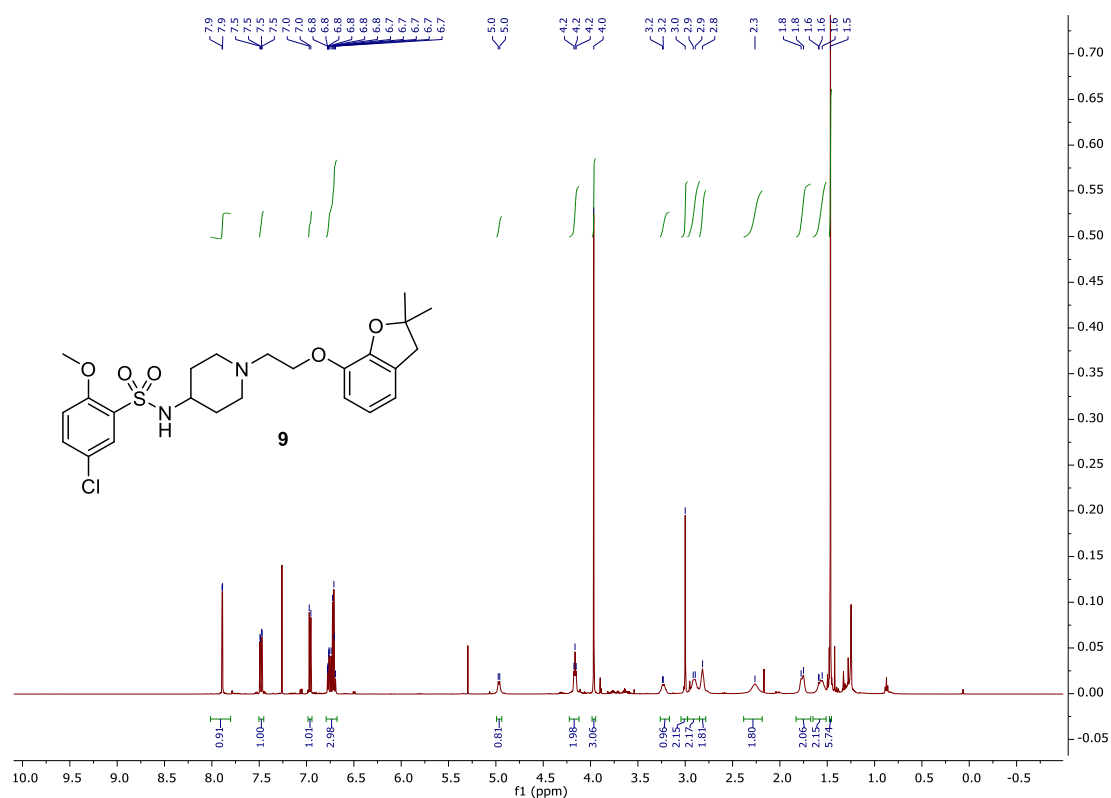

**Figure S23.** <sup>1</sup>H-NMR spectra (500 MHz, CDCl<sub>3</sub>) for 5-chloro-2-methoxy-N-{1-[2-(2,2-dimethyl-2,3-dihydrobenzofuran-7-yloxy)ethyl]piperidin-4-yl}benzenesulfonamide (**9**).

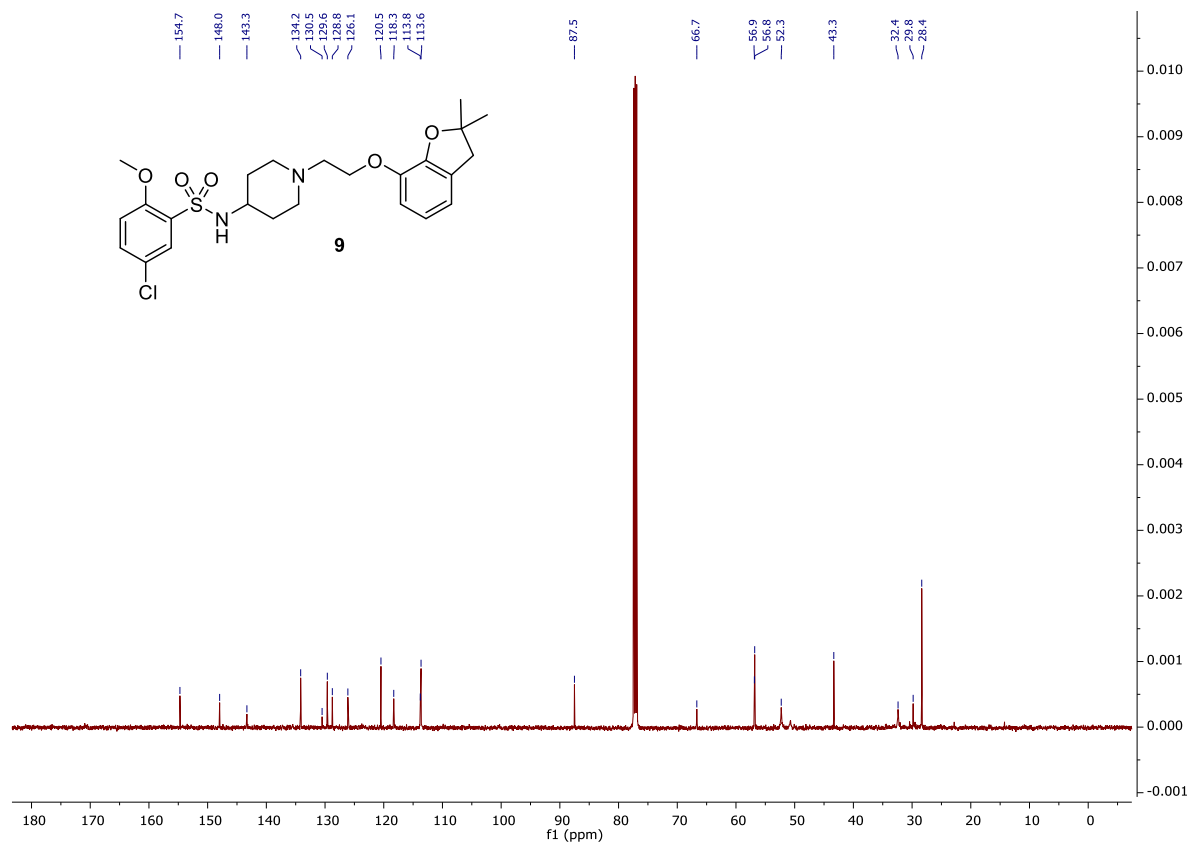

**Figure S24.** <sup>13</sup>C-NMR spectra (125 MHz, CDCl<sub>3</sub>) for 5-chloro-2-methoxy-N-{1-[2-(2,2-dimethyl-2,3-dihydrobenzofuran-7-yloxy)ethyl]piperidin-4-yl}benzenesulfonamide (**9**).

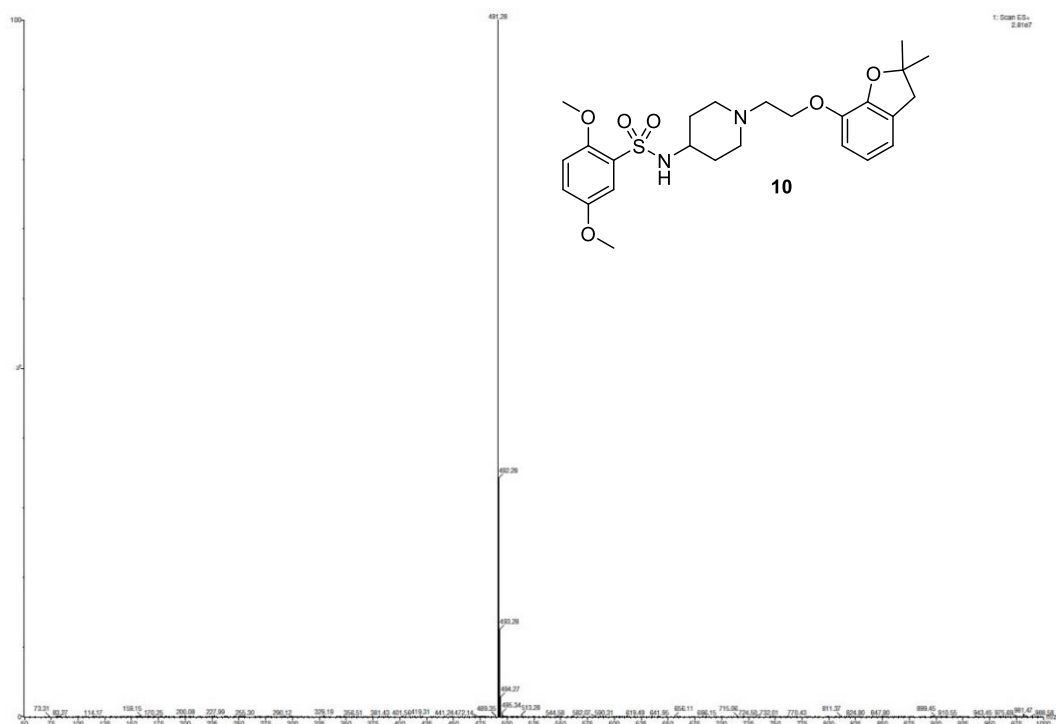

**Figure S25.** MS spectra for 2,4-dimethoxy-N-{1-[2-(2,2-dimethyl-2,3-dihydrobenzofuran-7-yloxy)ethyl]piperidin-4-yl}benzenesulfonamide (10).

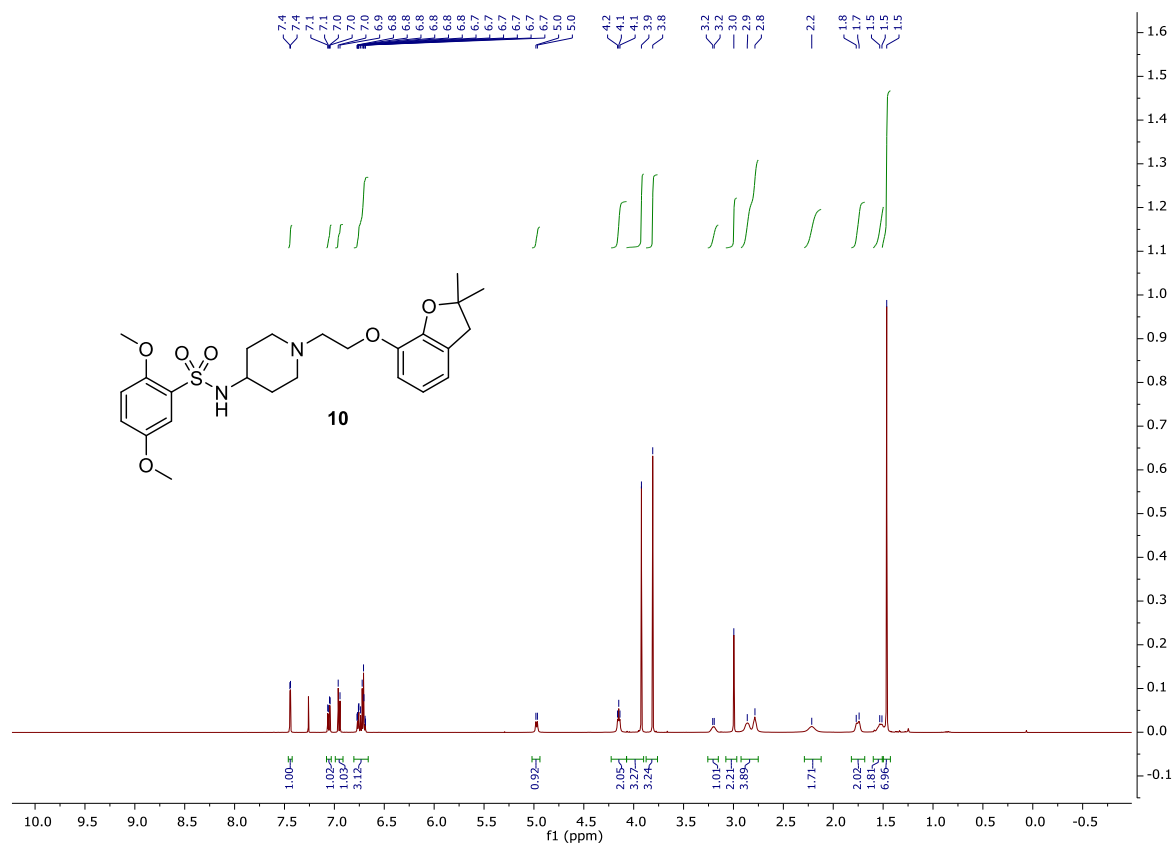

**Figure S26.** <sup>1</sup>H-NMR spectra (500 MHz, CDCl<sub>3</sub>) for 2,4-dimethoxy-N-{1-[2-(2,2-dimethyl-2,3-dihydrobenzofuran-7-yloxy)ethyl]piperidin-4-yl}benzenesulfonamide (10).

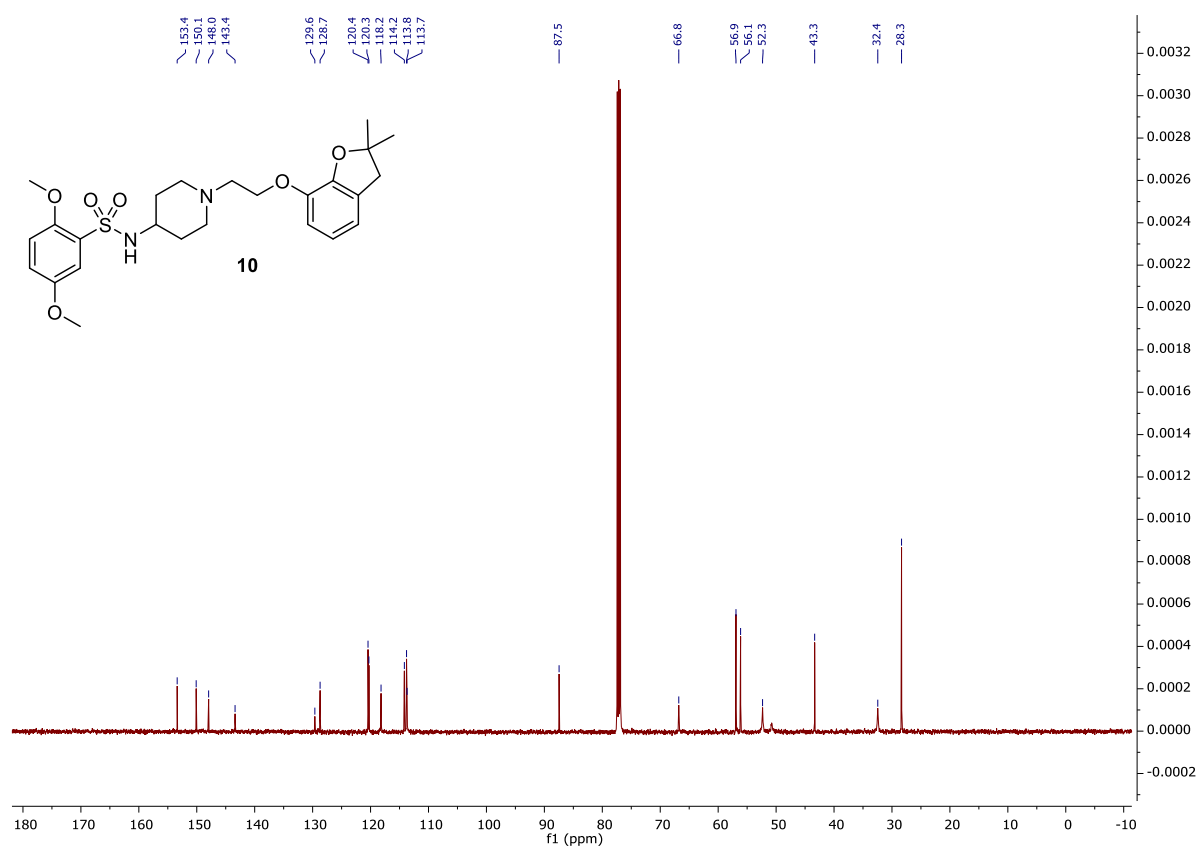

**Figure S27.** <sup>13</sup>C-NMR spectra (125 MHz, CDCl<sub>3</sub>) for 2,4-dimethoxy-N-{1-[2-(2,2-dimethyl-2,3-dihydrobenzofuran-7-yloxy)ethyl]piperidin-4-yl}benzenesulfonamide (**10**).



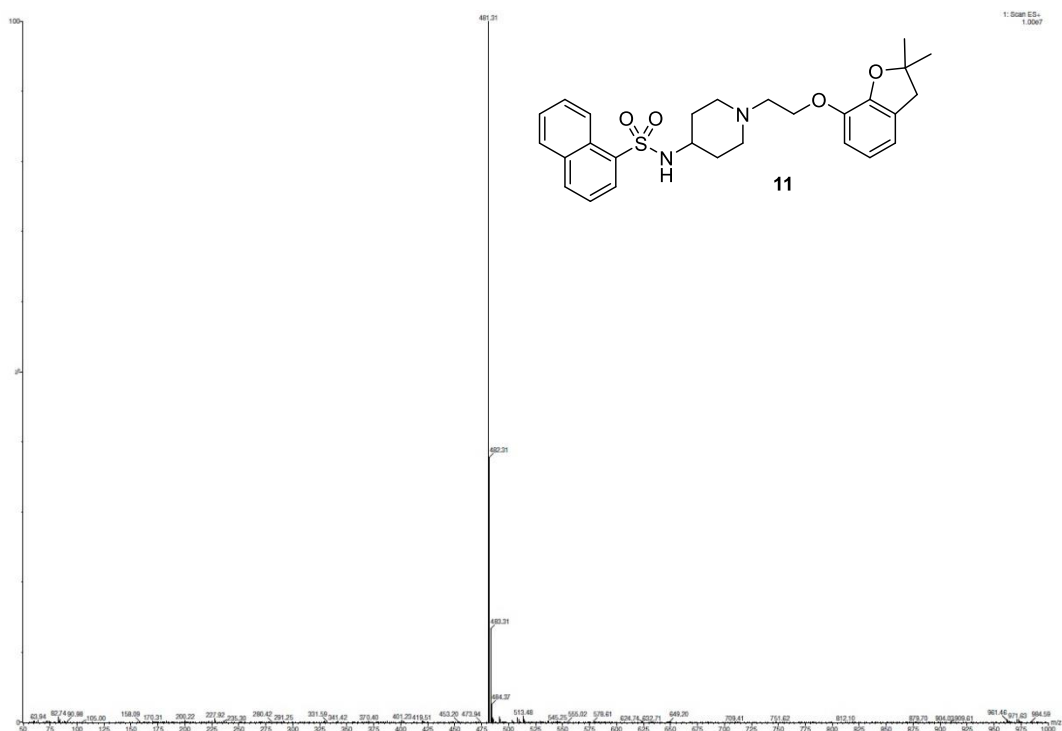

**Figure S28.** MS spectra for 1-naphthalene-N-{1-[2-(2,2-dimethyl-2,3-dihydrobenzofuran-7-yloxy)ethyl]piperidin-4-yl}sulfonamide (**11**).

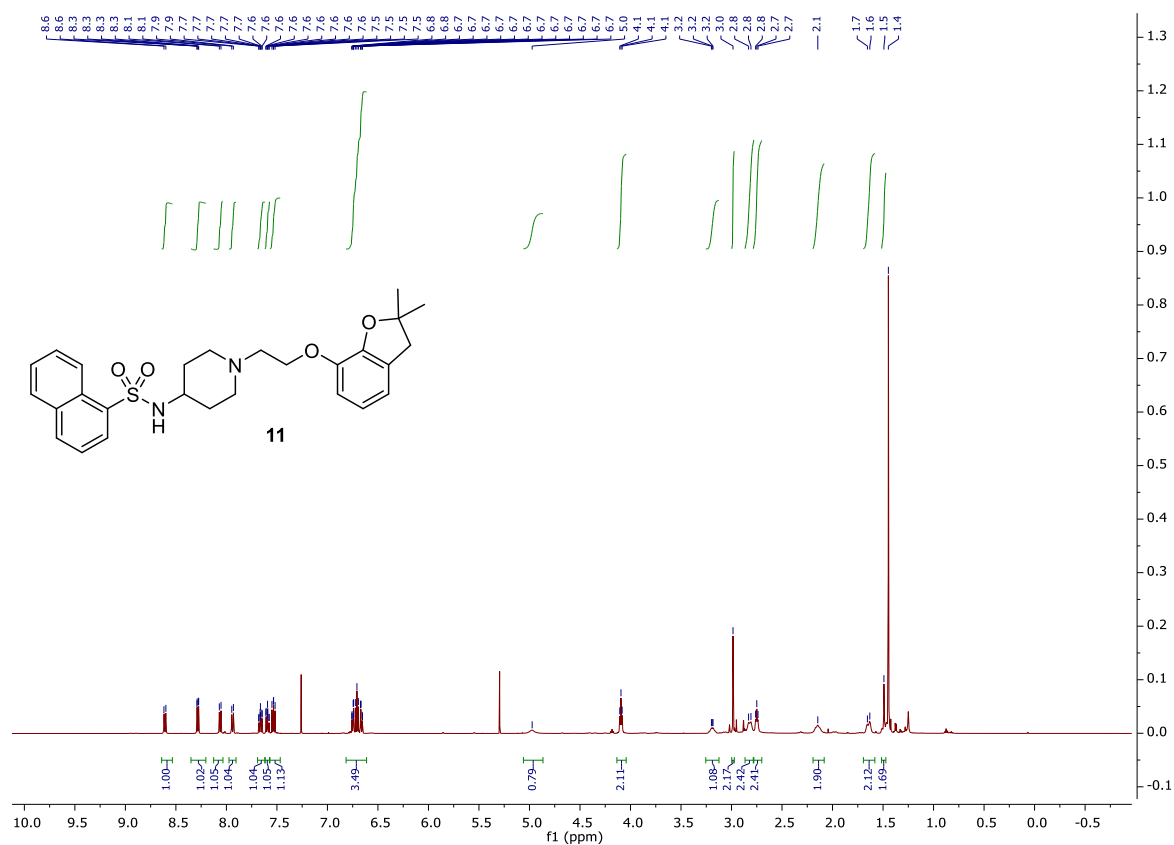

**Figure S29.** <sup>1</sup>H-NMR spectra (500 MHz, CDCl<sub>3</sub>) for 1-naphthalene-N-{1-[2-(2,2-dimethyl-2,3-dihydrobenzofuran-7-yloxy)ethyl]piperidin-4-yl}sulfonamide (**11**).

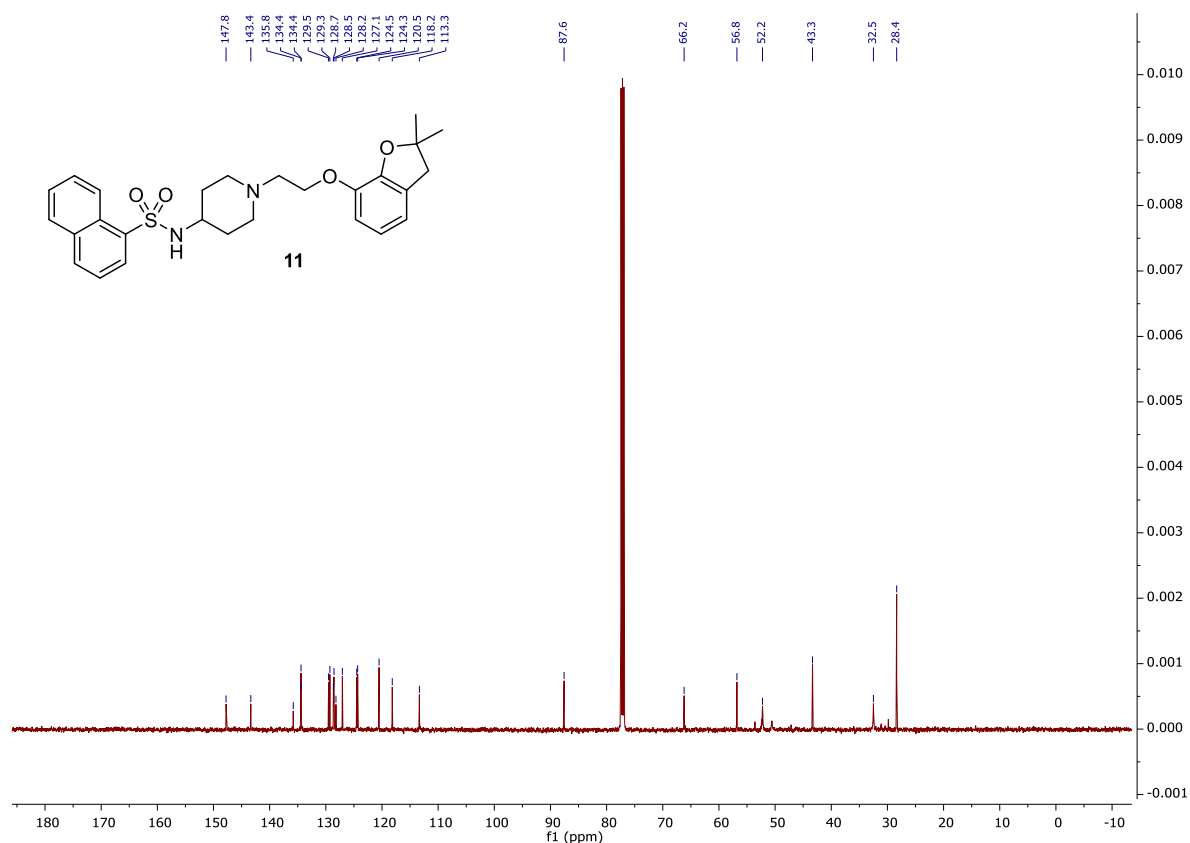

**Figure S30.**  $^{13}\text{C}$ -NMR spectra (125 MHz,  $\text{CDCl}_3$ ) for 1-naphthalene-*N*-[1-[2-(2,2-dimethyl-2,3-dihydrobenzofuran-7-yloxy)ethyl]piperidin-4-yl]sulfonamide (**11**).

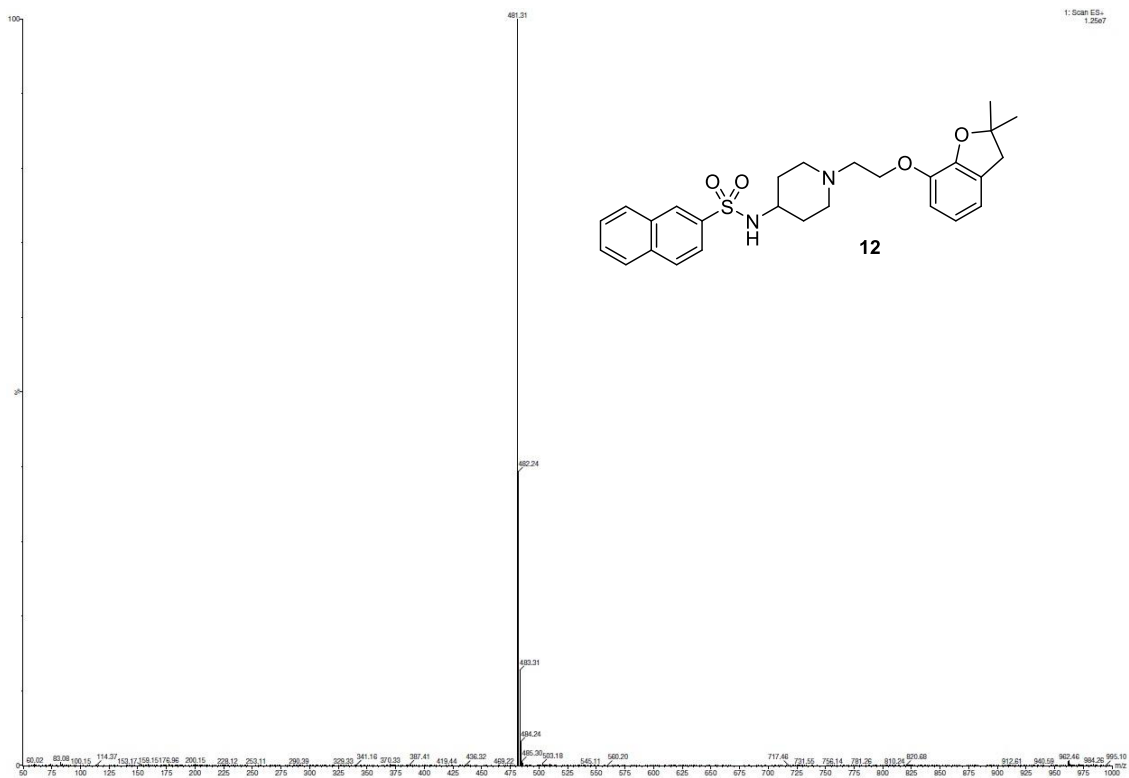

**Figure S31.** MS spectra for 2-naphthalene-*N*-[1-[2-(2,2-dimethyl-2,3-dihydrobenzofuran-7-yloxy)ethyl]piperidin-4-yl]sulfonamide (**12**).

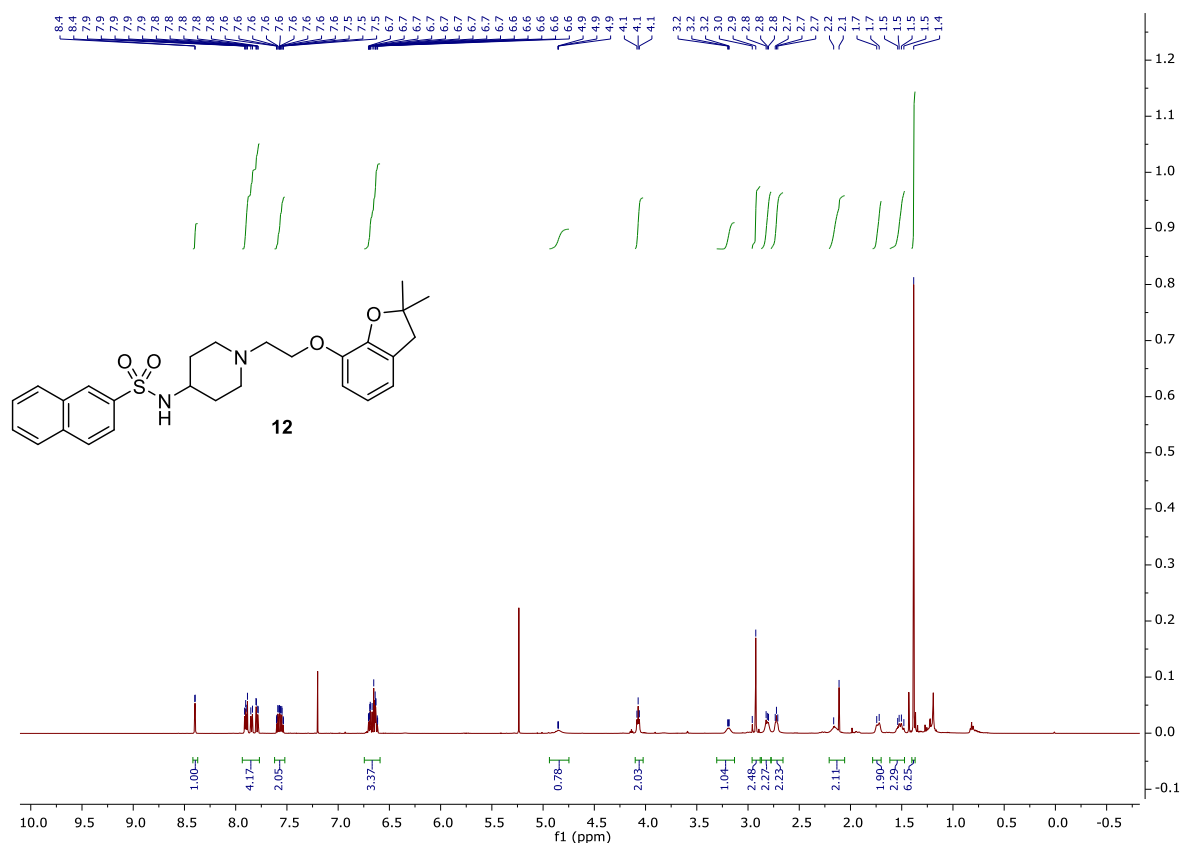

**Figure S32.** <sup>1</sup>H-NMR spectra (500 MHz, CDCl<sub>3</sub>) for 2-naphthalene-*N*-[1-[2-(2,2-dimethyl-2,3-dihydrobenzofuran-7-yloxy)ethyl]piperidin-4-yl]sulfonamide (**12**).

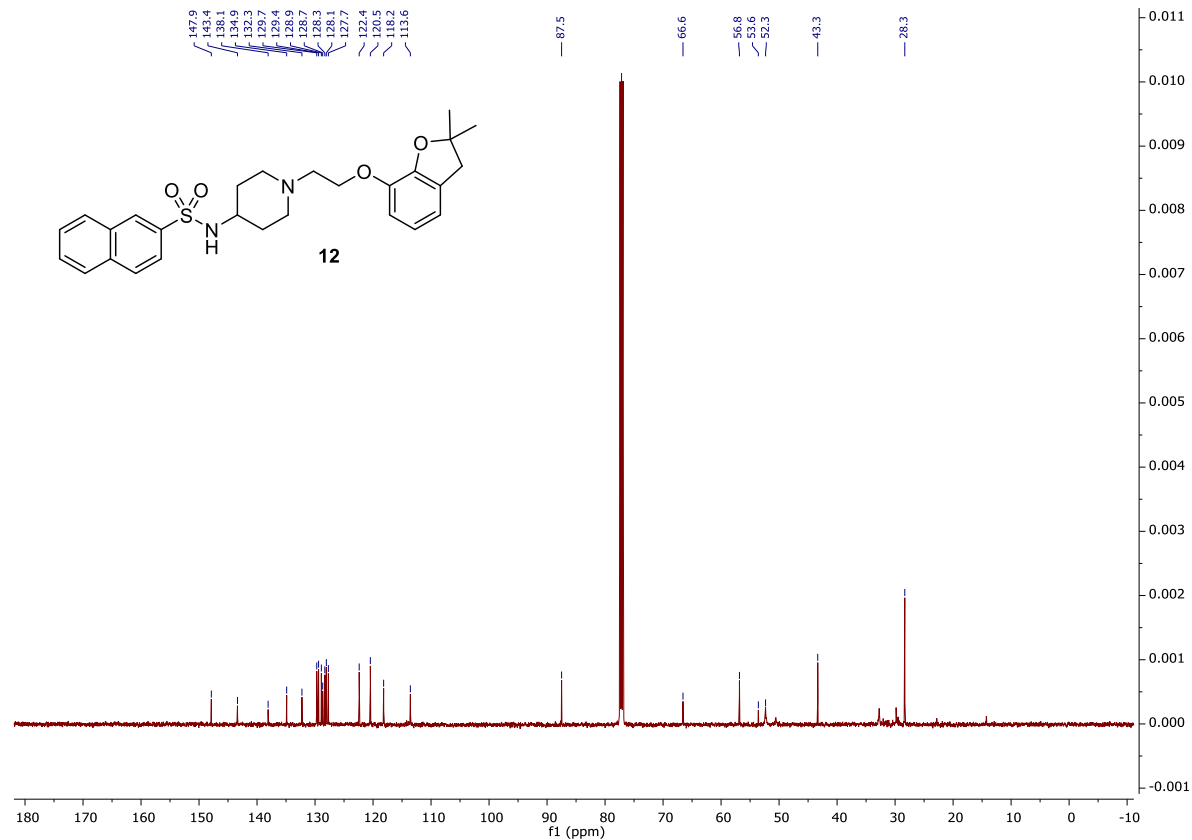

**Figure S33.** <sup>13</sup>C-NMR spectra (125 MHz, CDCl<sub>3</sub>) for 2-naphthalene-*N*-[1-[2-(2,2-dimethyl-2,3-dihydrobenzofuran-7-yloxy)ethyl]piperidin-4-yl]sulfonamide (**12**).

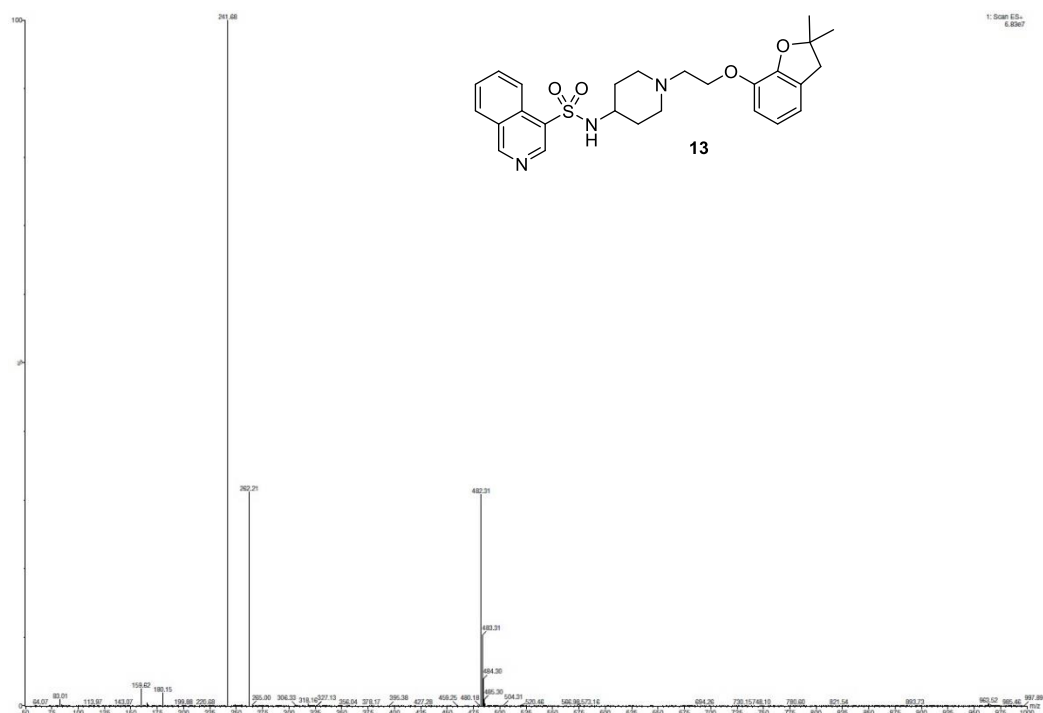

**Figure S34.** MS spectra for 4-isoquinoline-N-[1-[2-(2,2-dimethyl-2,3-dihydrobenzofuran-7-yloxy)ethyl]piperidin-4-yl]sulfonamide (13).

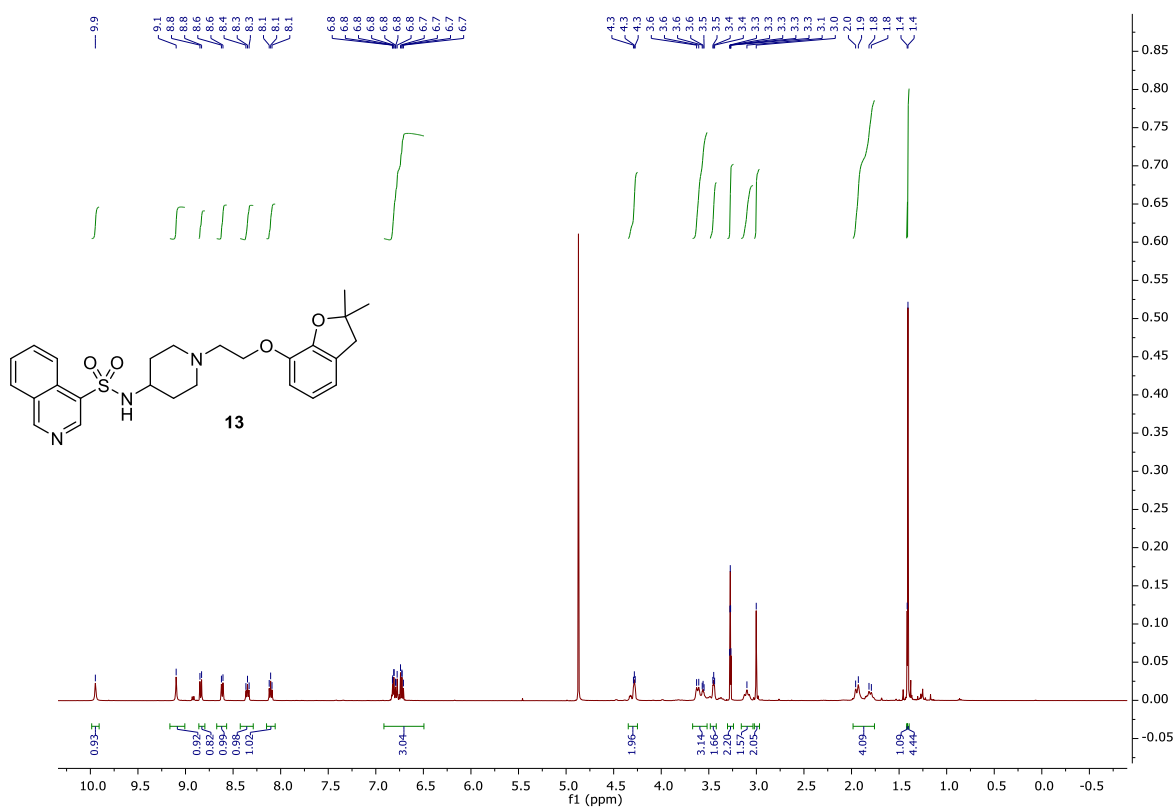

**Figure S35.**  $^1\text{H}$ -NMR spectra (500 MHz,  $\text{CDCl}_3$ ) for 4-isoquinoline-N-[1-[2-(2,2-dimethyl-2,3-dihydrobenzofuran-7-yloxy)ethyl]piperidin-4-yl]sulfonamide (13).

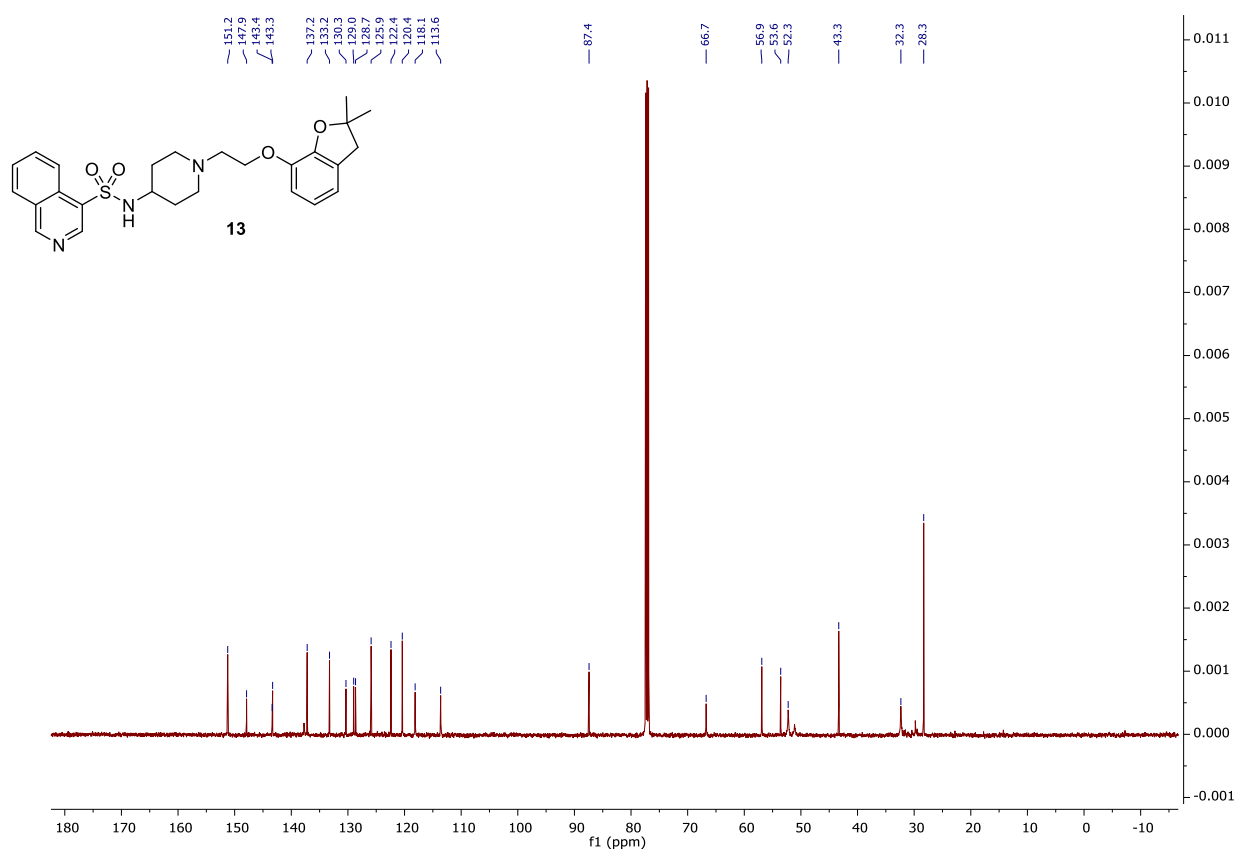

**Figure S36.** <sup>13</sup>C-NMR spectra (125 MHz, CDCl<sub>3</sub>) for 4-isoquinoline-*N*-[1-[2-(2,2-dimethyl-2,3-dihydrobenzofuran-7-yloxy)ethyl]piperidin-4-yl]sulfonamide (**13**).

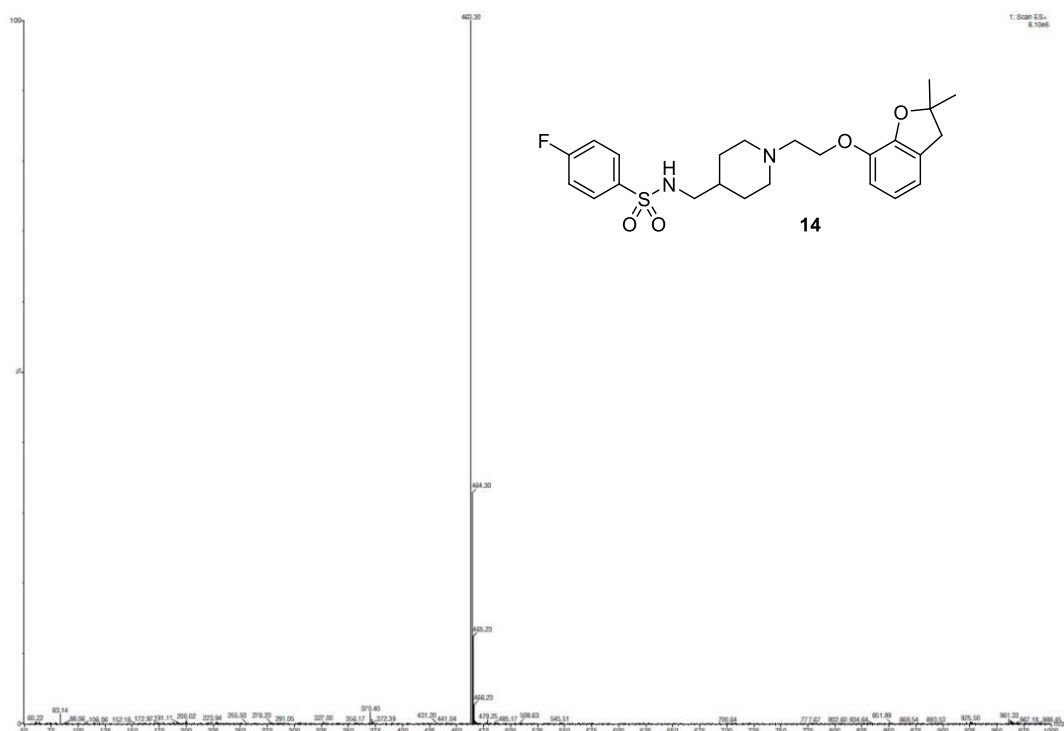

**Figure S37.** MS spectra for 4-fluoro-*N*-({1-[2-(2,2-dimethyl-2,3-dihydrobenzofuran-7-yloxy)ethyl]piperidin-4-yl)methyl}benzenesulfonamide (**14**).

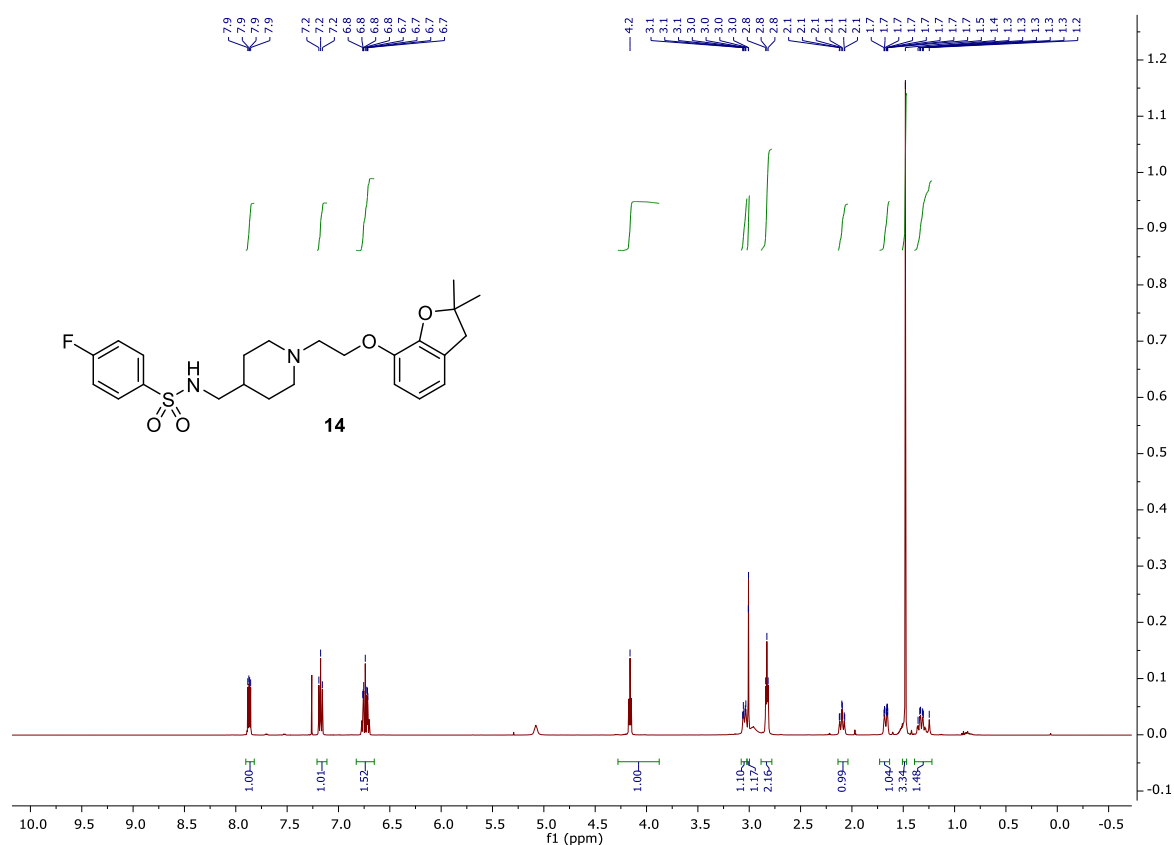

**Figure S38.**  $^1\text{H}$ -NMR spectra (500 MHz,  $\text{CDCl}_3$ ) for 4-fluoro-*N*-({1-[2-(2,2-dimethyl-2,3-dihydrobenzofuran-7-yloxy)ethyl]piperidin-4-yl)methyl}benzenesulfonamide (**14**).

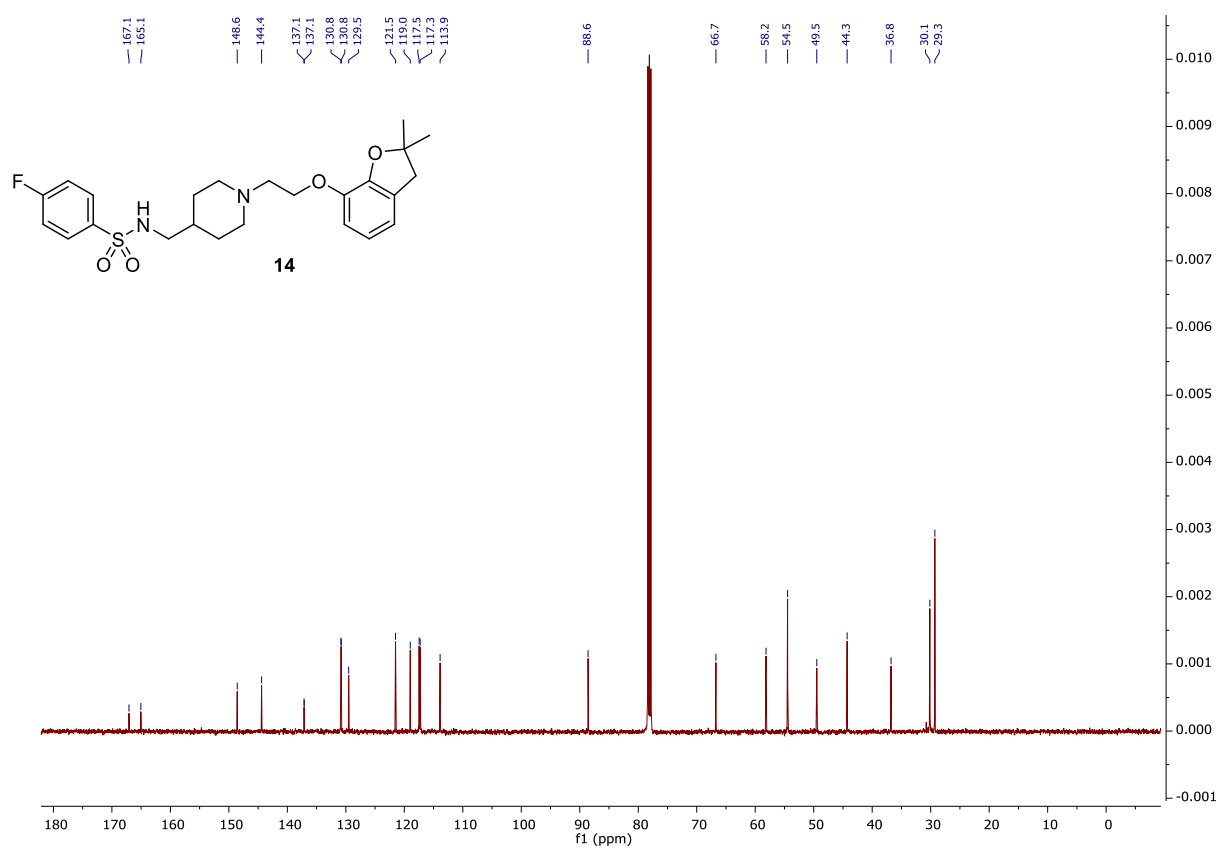

**Figure S39.** <sup>13</sup>C-NMR spectra (125 MHz, CDCl<sub>3</sub>) for 4-fluoro-N-((1-[2-(2,2-dimethyl-2,3-dihydrobenzofuran-7-yloxy)ethyl]piperidin-4-yl)methyl)benzenesulfonamide (**14**).

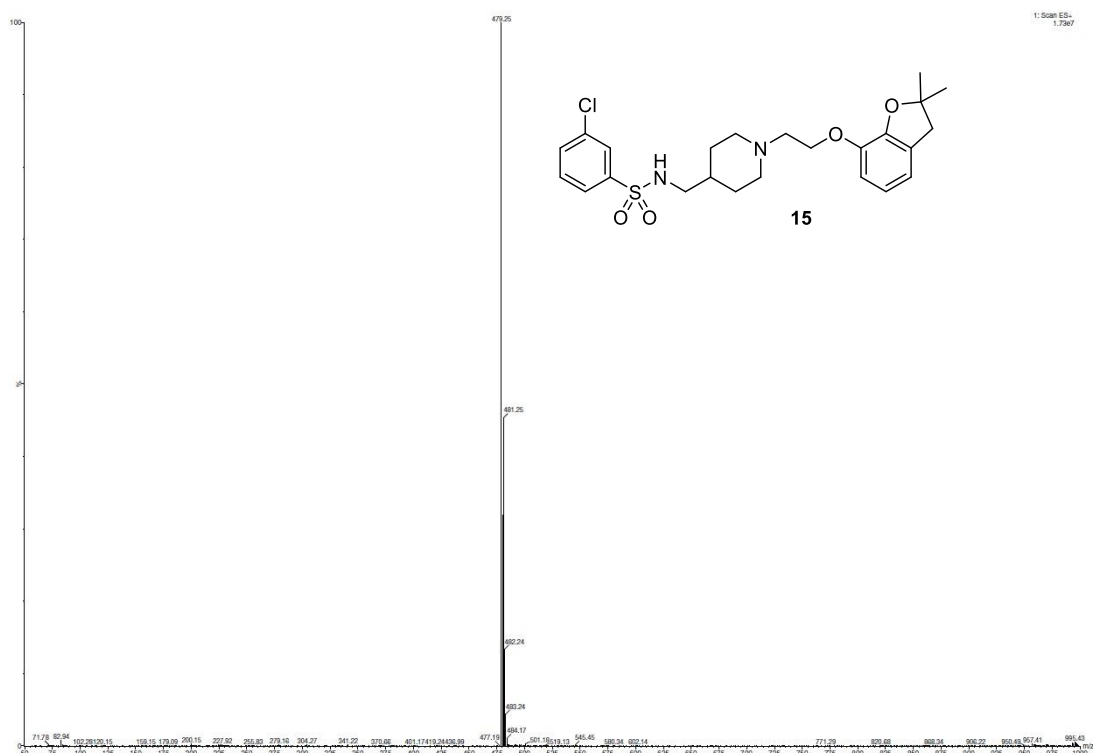

**Figure S40.** MS spectra for 3-chloro-N-((1-[2-(2,2-dimethyl-2,3-dihydrobenzofuran-7-yloxy)ethyl]piperidin-4-yl)methyl)benzenesulfonamide (15).

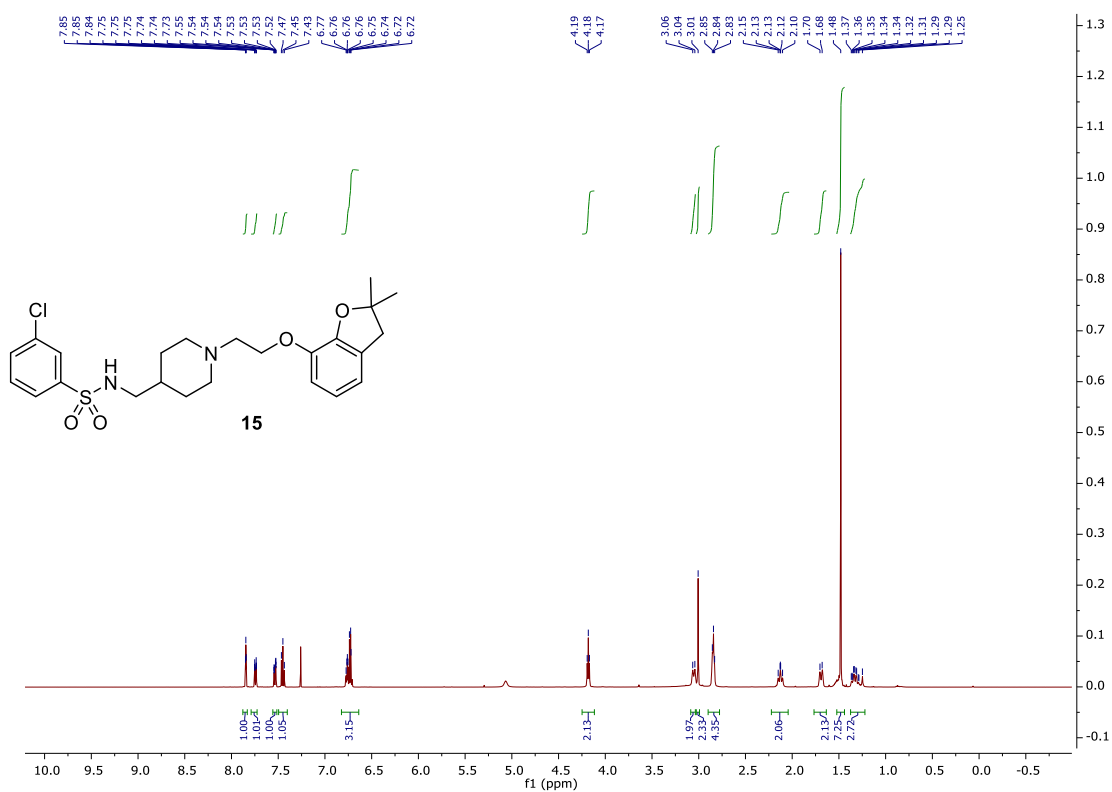

**Figure S41.**  $^1\text{H}$ -NMR spectra (500 MHz,  $\text{CDCl}_3$ ) for 3-chloro-N-((1-[2-(2,2-dimethyl-2,3-dihydrobenzofuran-7-yloxy)ethyl]piperidin-4-yl)methyl)benzenesulfonamide (15).



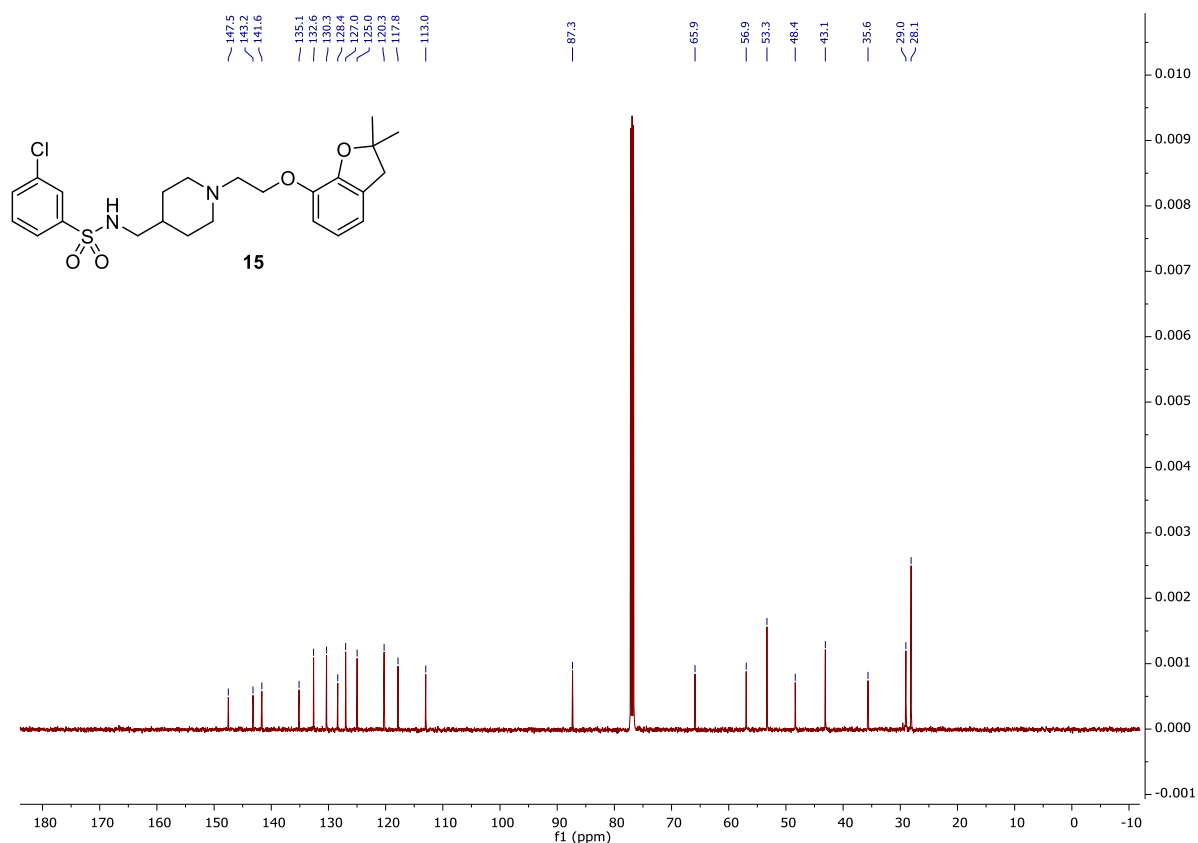

**Figure S42.** <sup>13</sup>C-NMR spectra (125 MHz, CDCl<sub>3</sub>) for 3-chloro-N-({1-[2-(2,2-dimethyl-2,3-dihydrobenzofuran-7-yloxy)ethyl]piperidin-4-yl}methyl)benzenesulfonamide (15).

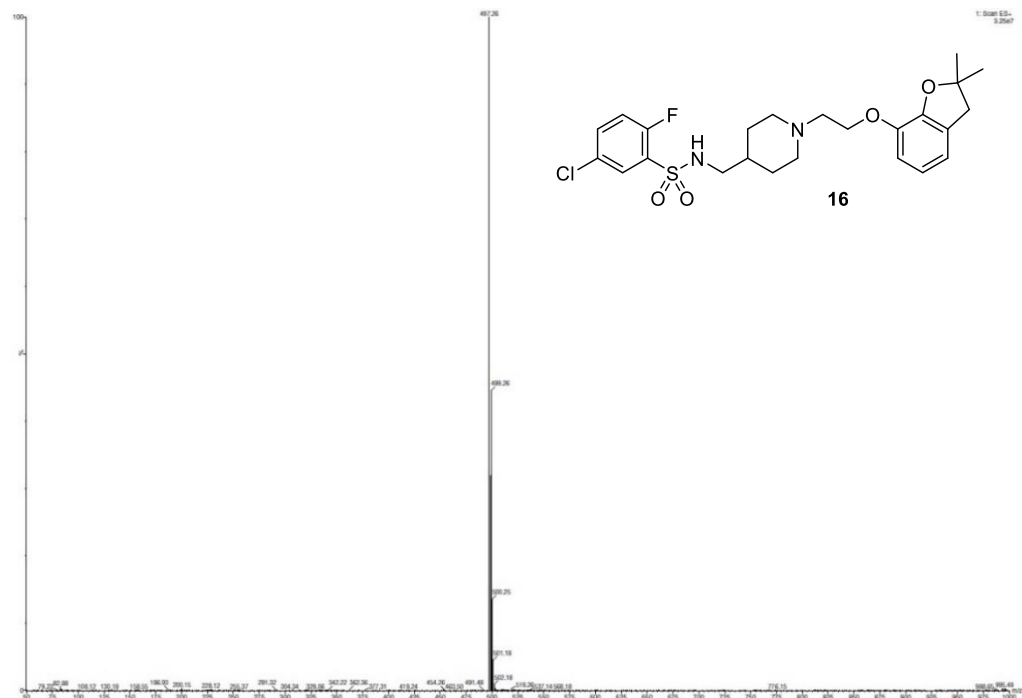

**Figure S43.** MS spectra for 5-chloro-2-fluoro-N-({1-[2-(2,2-dimethyl-2,3-dihydrobenzofuran-7-yloxy)ethyl]piperidin-4-yl}methyl)benzenesulfonamide (16).

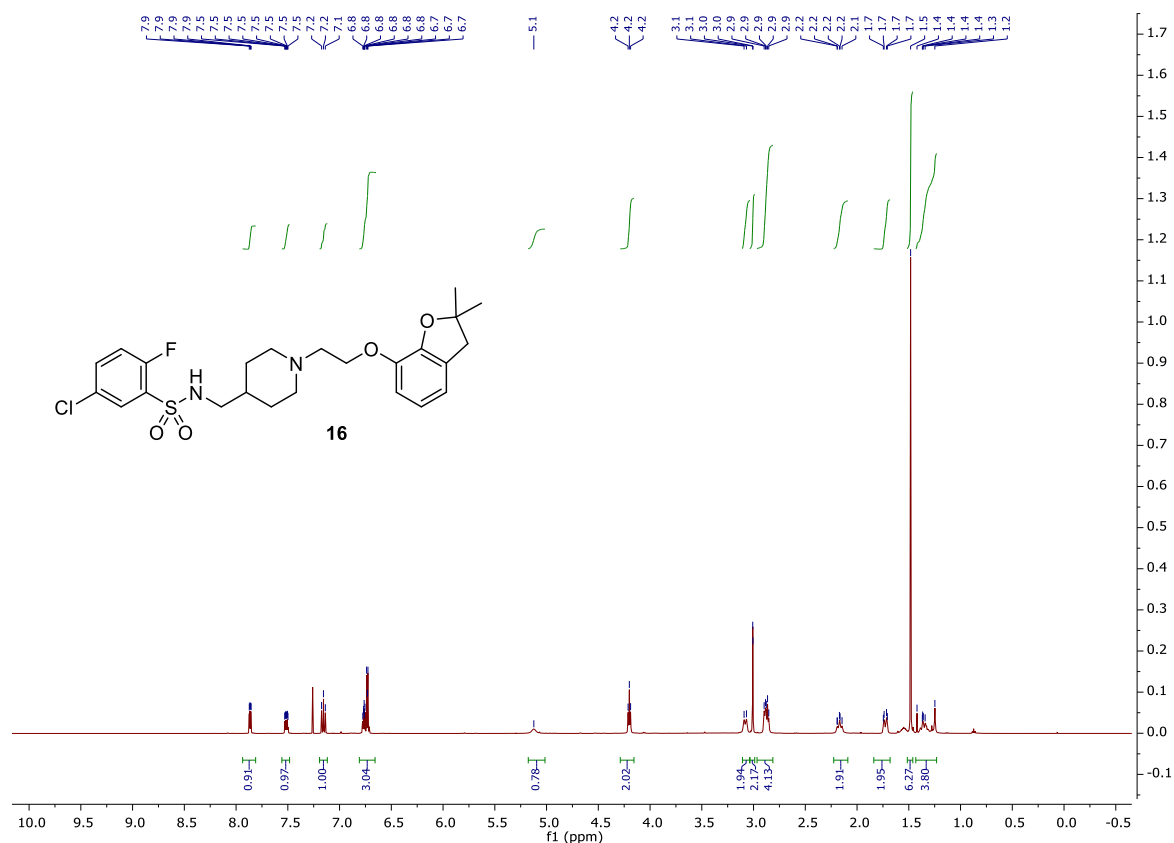

**Figure S44.** <sup>1</sup>H-NMR spectra (500 MHz, CDCl<sub>3</sub>) for 5-chloro-2-fluoro-N-({1-[2-(2,2-dimethyl-2,3-dihydrobenzofuran-7-yloxy)ethyl]piperidin-4-yl}methyl)benzenesulfonamide (**16**).

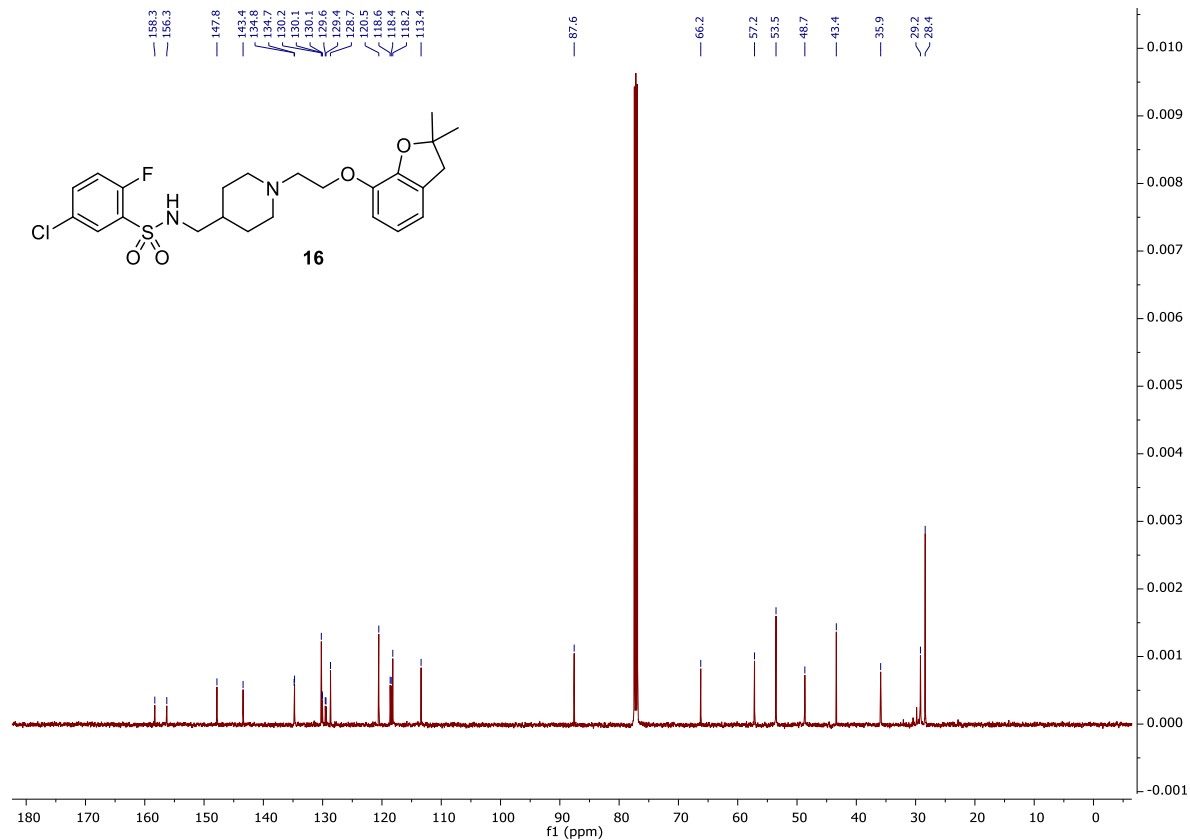

**Figure S45.** <sup>13</sup>C-NMR spectra (125 MHz, CDCl<sub>3</sub>) for 5-chloro-2-fluoro-N-({1-[2-(2,2-dimethyl-2,3-dihydrobenzofuran-7-yloxy)ethyl]piperidin-4-yl}methyl)benzenesulfonamide (**16**).

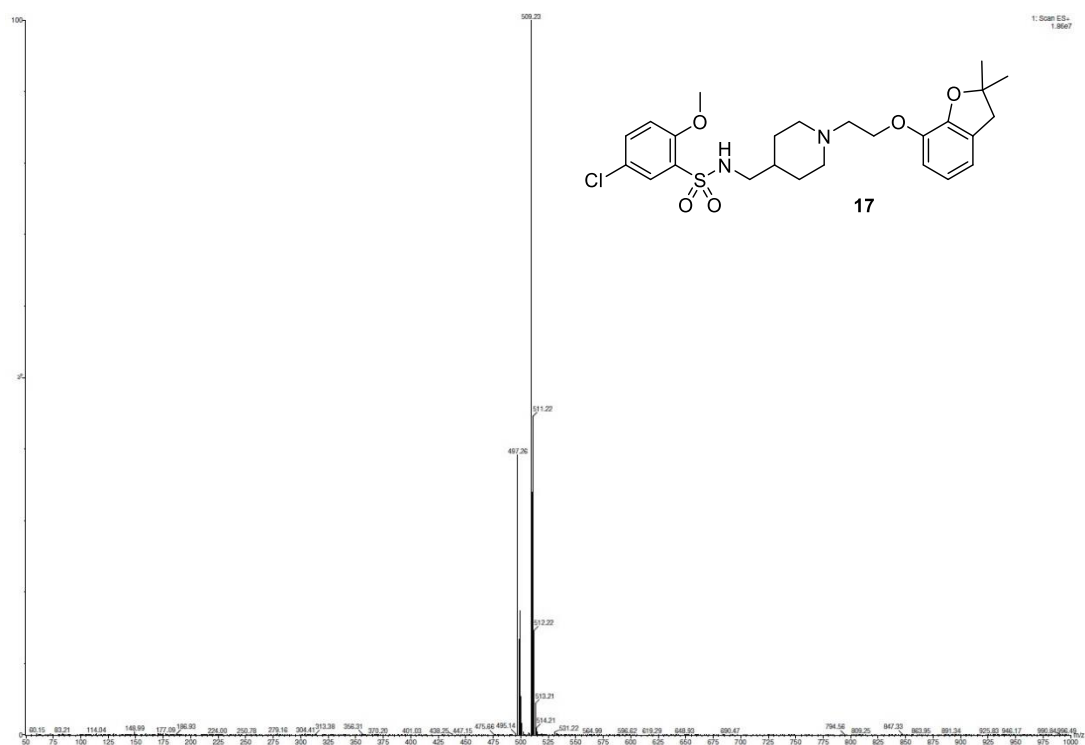

**Figure S46.** MS spectra for 5-chloro-2-methoxy-N-({1-[2-(2,2-dimethyl-2,3-dihydrobenzofuran-7-yloxy)ethyl]piperidin-4-yl)methyl}benzenesulfonamide (**17**).

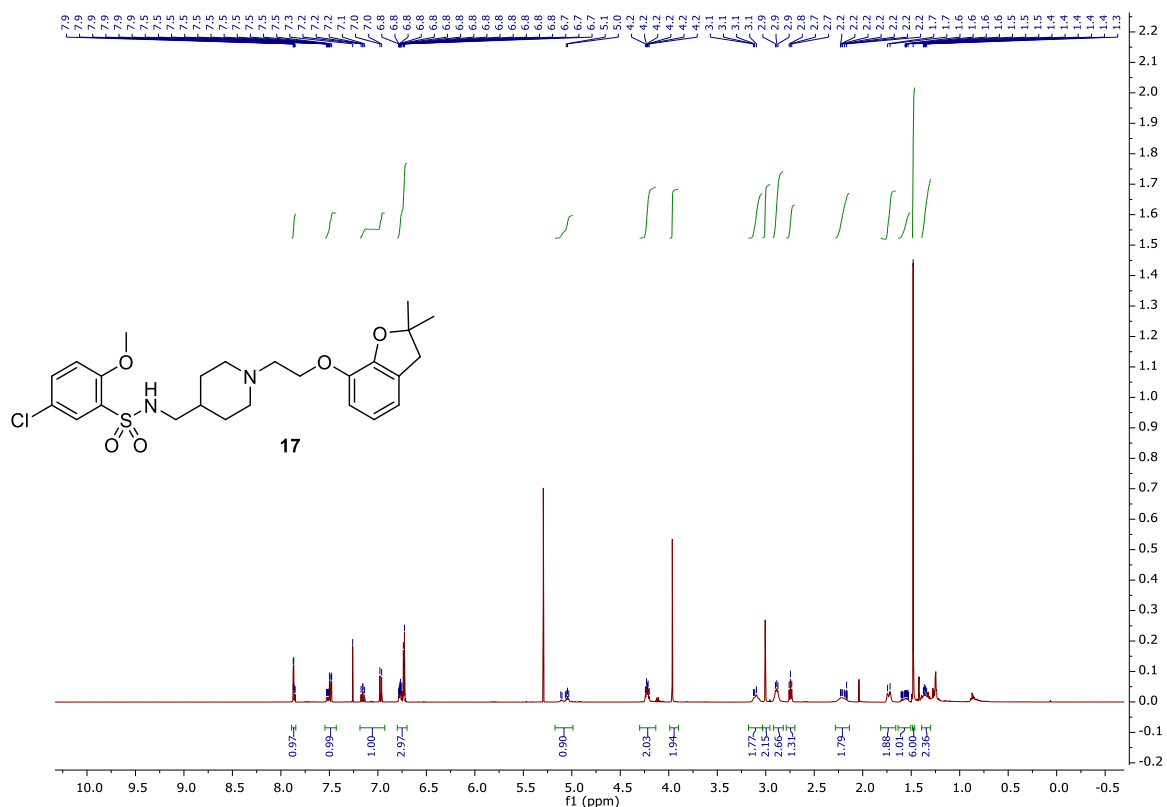

**Figure S47.** <sup>1</sup>H-NMR spectra (500 MHz, CDCl<sub>3</sub>) for 5-chloro-2-methoxy-N-({1-[2-(2,2-dimethyl-2,3-dihydrobenzofuran-7-yloxy)ethyl]piperidin-4-yl)methyl}benzenesulfonamide (**17**).

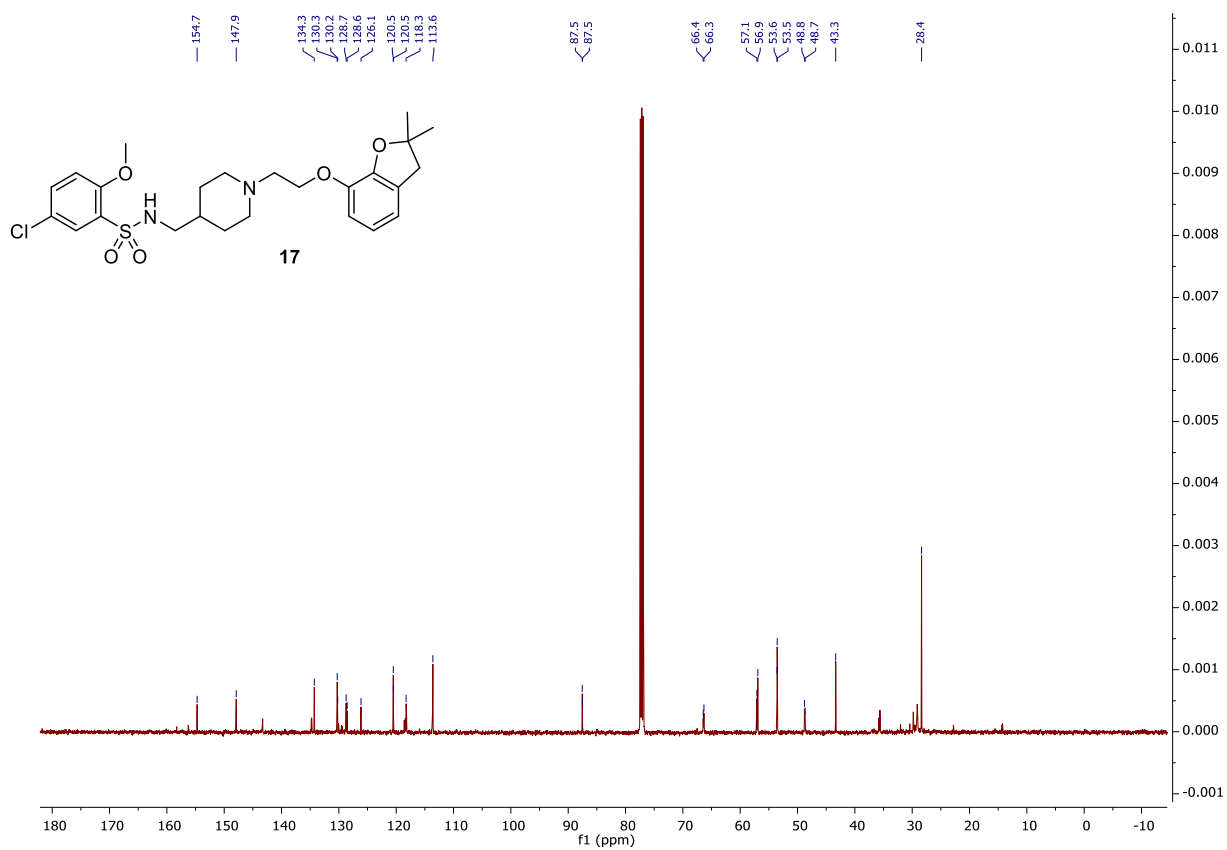

**Figure S48.** <sup>13</sup>C-NMR spectra (125 MHz, CDCl<sub>3</sub>) for 5-chloro-2-methoxy-N-({1-[2-(2,2-dimethyl-2,3-dihydrobenzofuran-7-yloxy)ethyl]piperidin-4-yl}methyl)benzenesulfonamide (**17**).

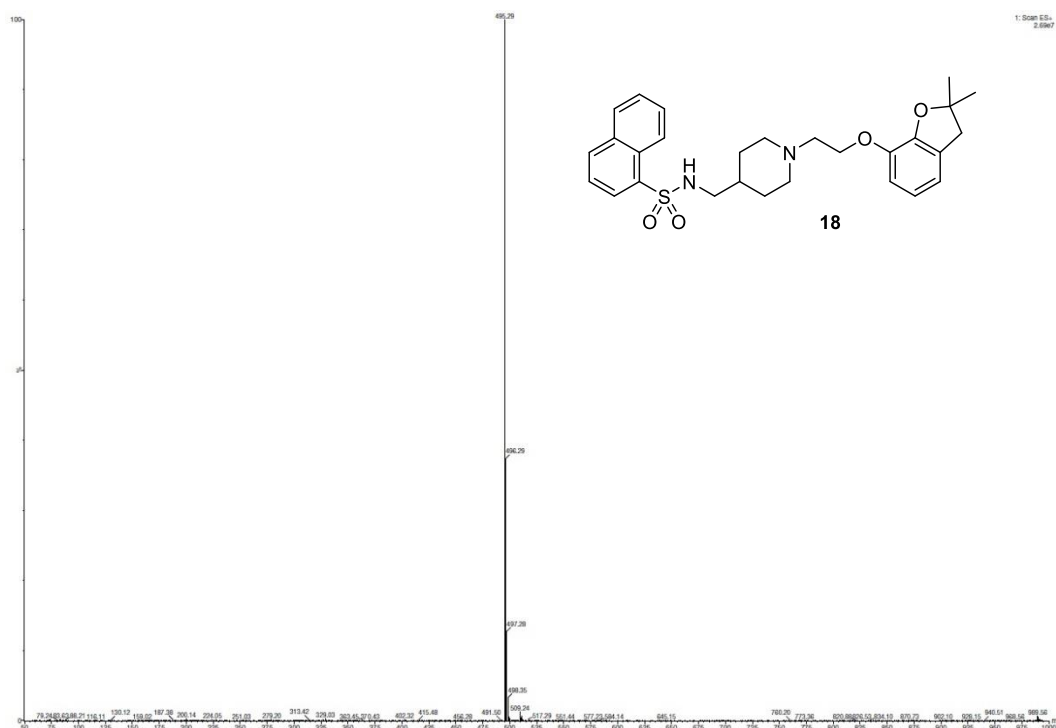

**Figure S49.** MS spectra for 1-naphthalene-*N*-([1-[2-(2,2-dimethyl-2,3-dihydrobenzofuran-7-yloxy)ethyl]piperidin-4-yl)methyl)sulfonamide (**18**).

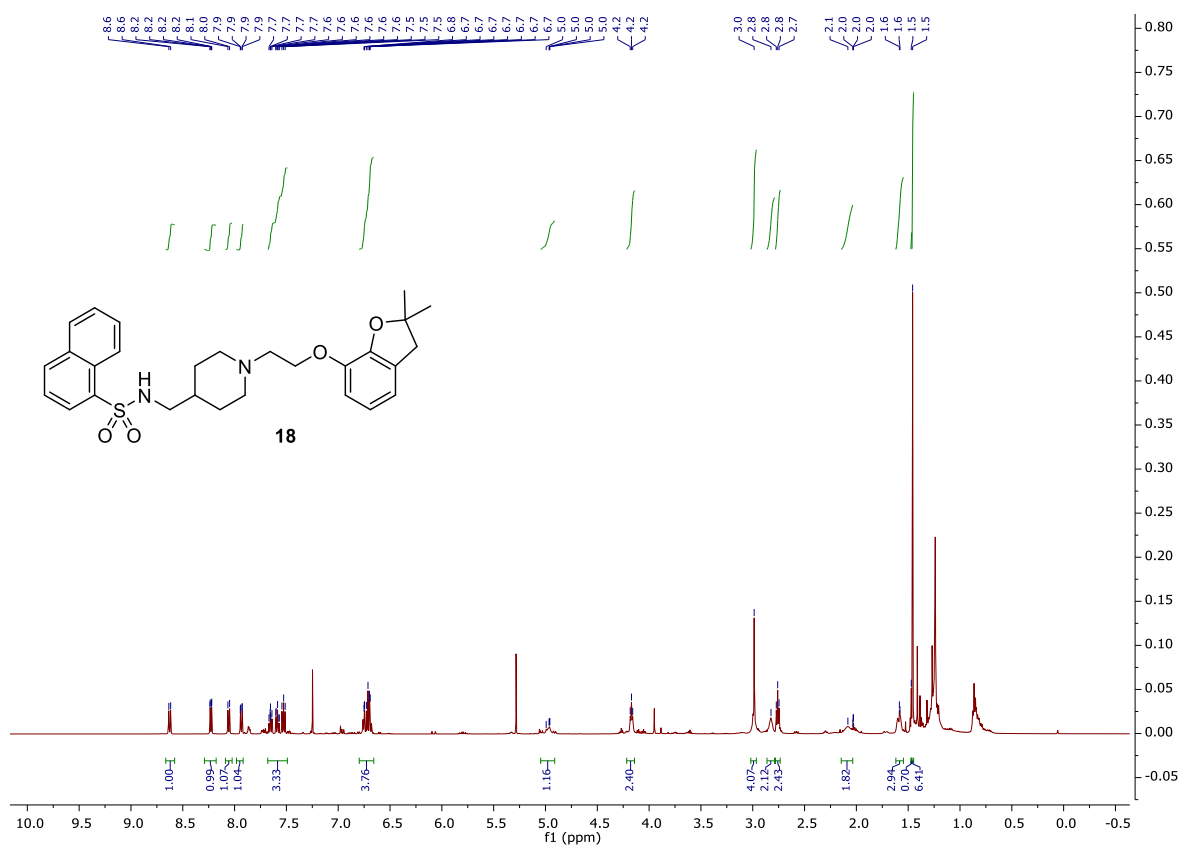

**Figure S50.**  $^1\text{H}$ -NMR spectra (500 MHz,  $\text{CDCl}_3$ ) for 1-naphthalene-*N*-([1-[2-(2,2-dimethyl-2,3-dihydrobenzofuran-7-yloxy)ethyl]piperidin-4-yl)methyl)sulfonamide (**18**).

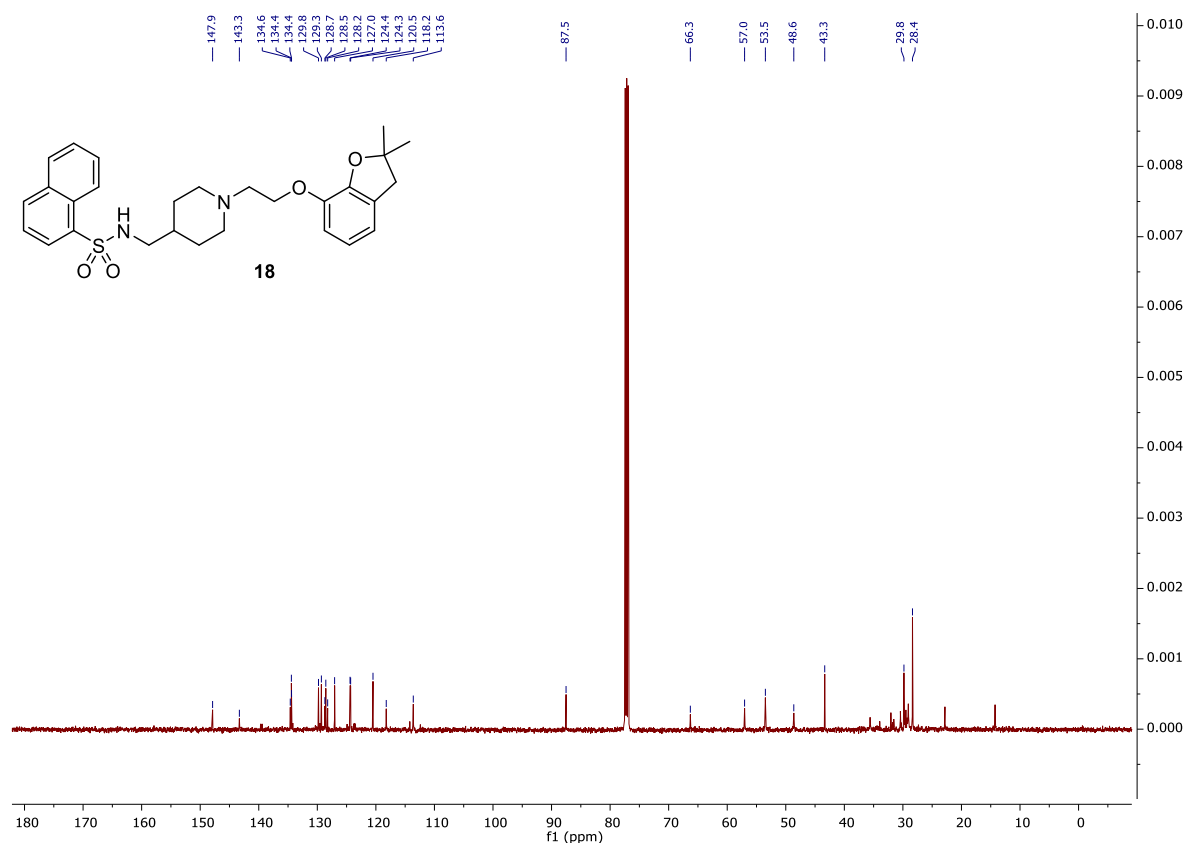

**Figure S51.**  $^{13}\text{C}$ -NMR spectra (125 MHz,  $\text{CDCl}_3$ ) for 1-naphthalene-*N*-({1-[2-(2,2-dimethyl-2,3-dihydrobenzofuran-7-yloxy)ethyl]piperidin-4-yl}methyl)sulfonamide (**18**).

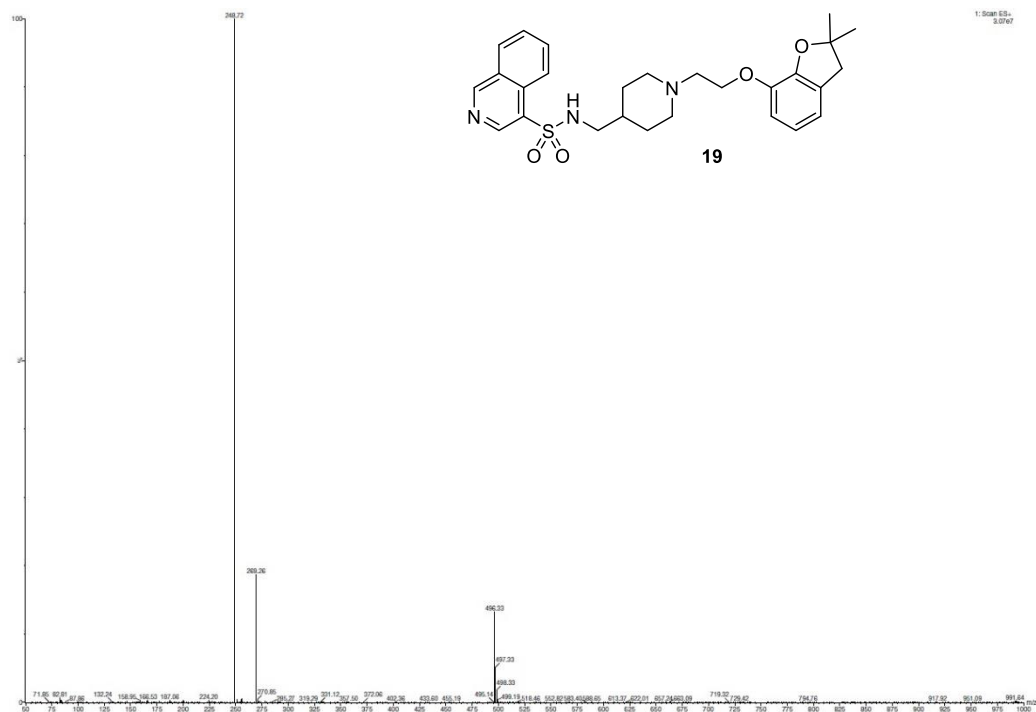

**Figure S52.** MS spectra for 4-isoquinoline-*N*-({1-[2-(2,2-dimethyl-2,3-dihydrobenzofuran-7-yloxy)ethyl]piperidin-4-yl}methyl)sulfonamide (**19**).

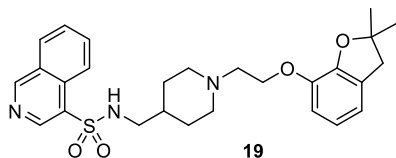

**19**

<sup>13</sup>C NMR (CDCl<sub>3</sub>) δ: 158.0, 147.8, 144.8, 143.3, 133.0, 130.9, 129.7, 129.0, 128.7, 128.6, 123.9, 120.5.

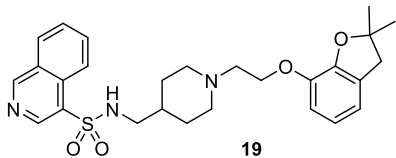

**Figure S54.** <sup>13</sup>C-NMR spectra (125 MHz, CDCl<sub>3</sub>) for 4-isoquinoline-*N*-({1-[2-(2,2-dimethyl-2,3-dihydrobenzofuran-7-yloxy)ethyl]piperidin-4-yl}methyl)sulfonamide (**19**).
